# Supplementary material
Source: publisher figshare collection journal article supplement (https://frontiersin.figshare.com/ndownloader/files/14837420)
Supplement: Supplementary file [file 14837420]

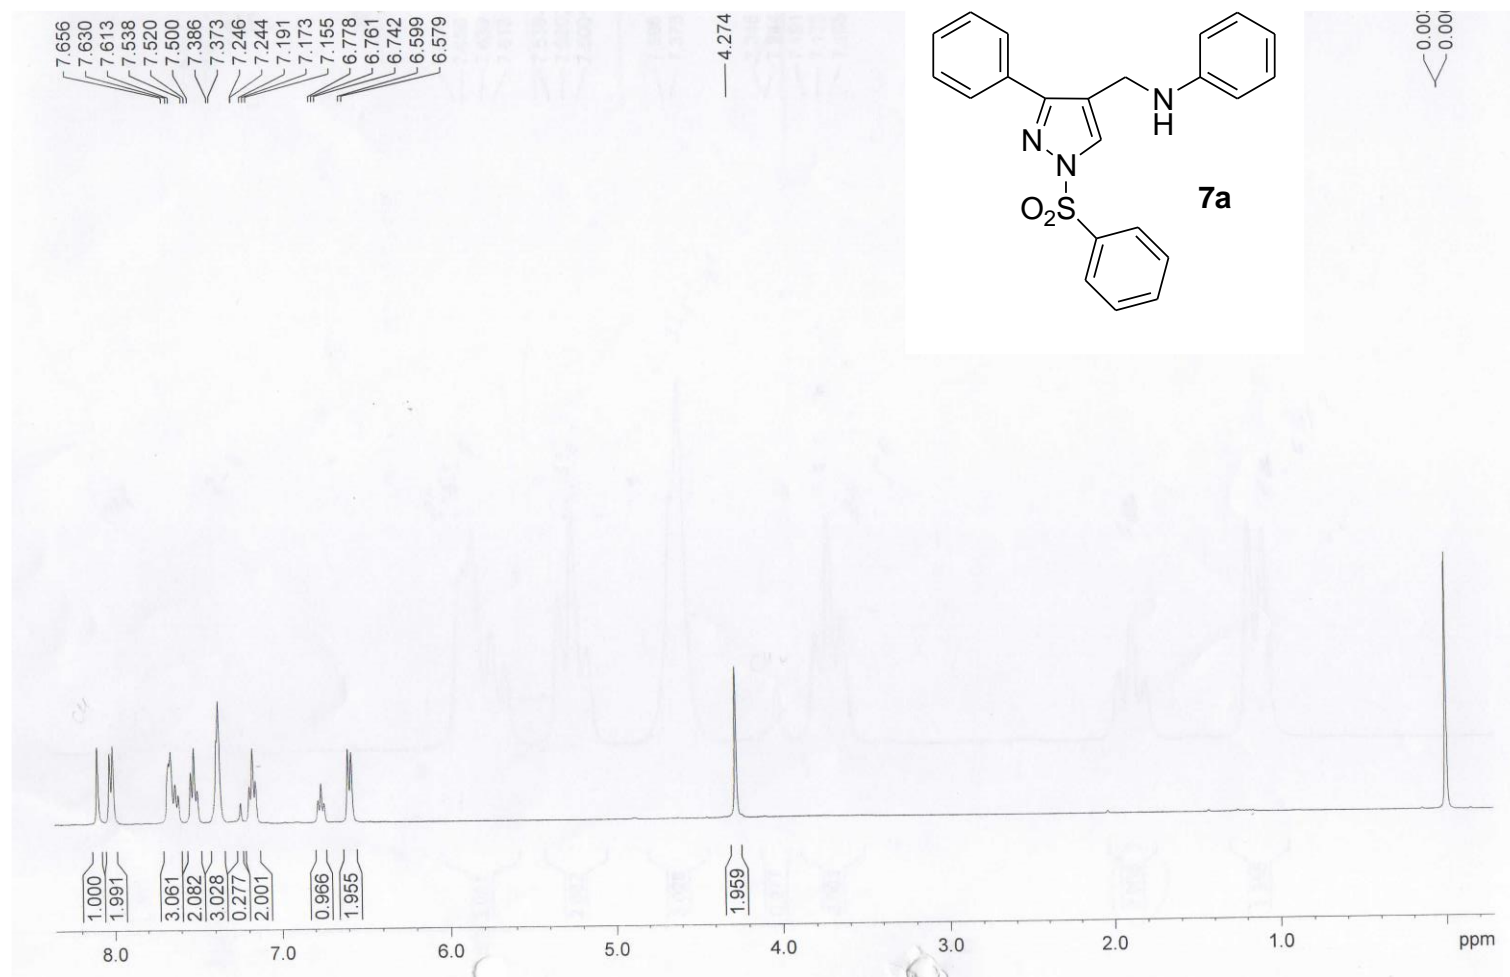

Fig S 1. <sup>1</sup>H NMR spectrum of compound **7a**

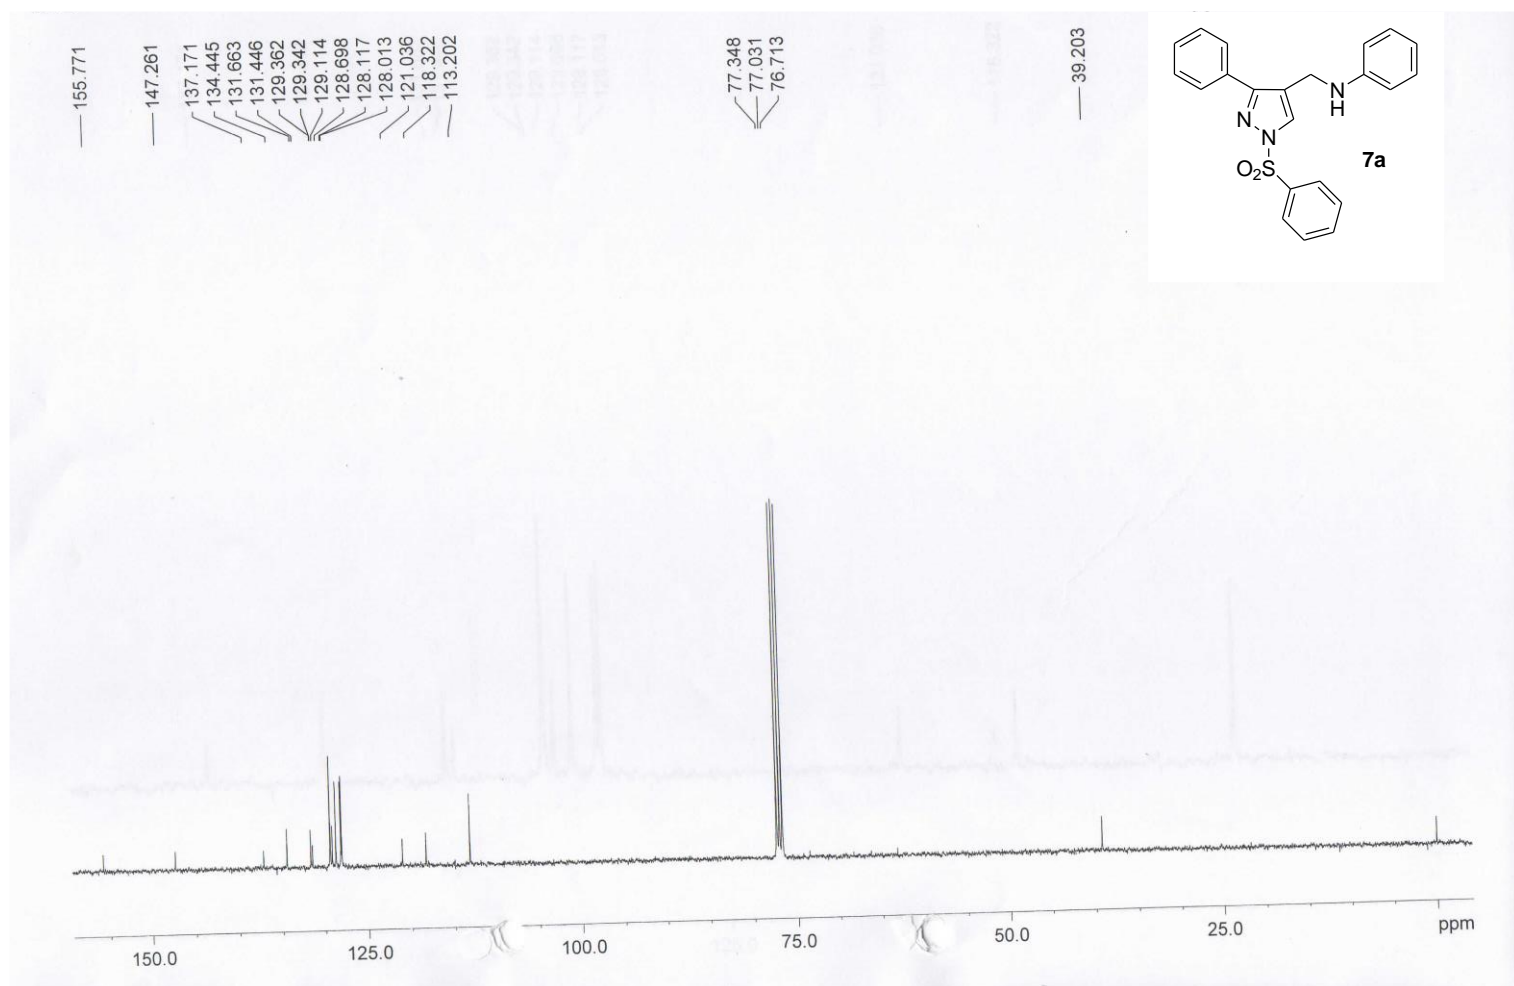

Fig S 1.  $^{13}\text{C}$  NMR spectrum of compound **7a**

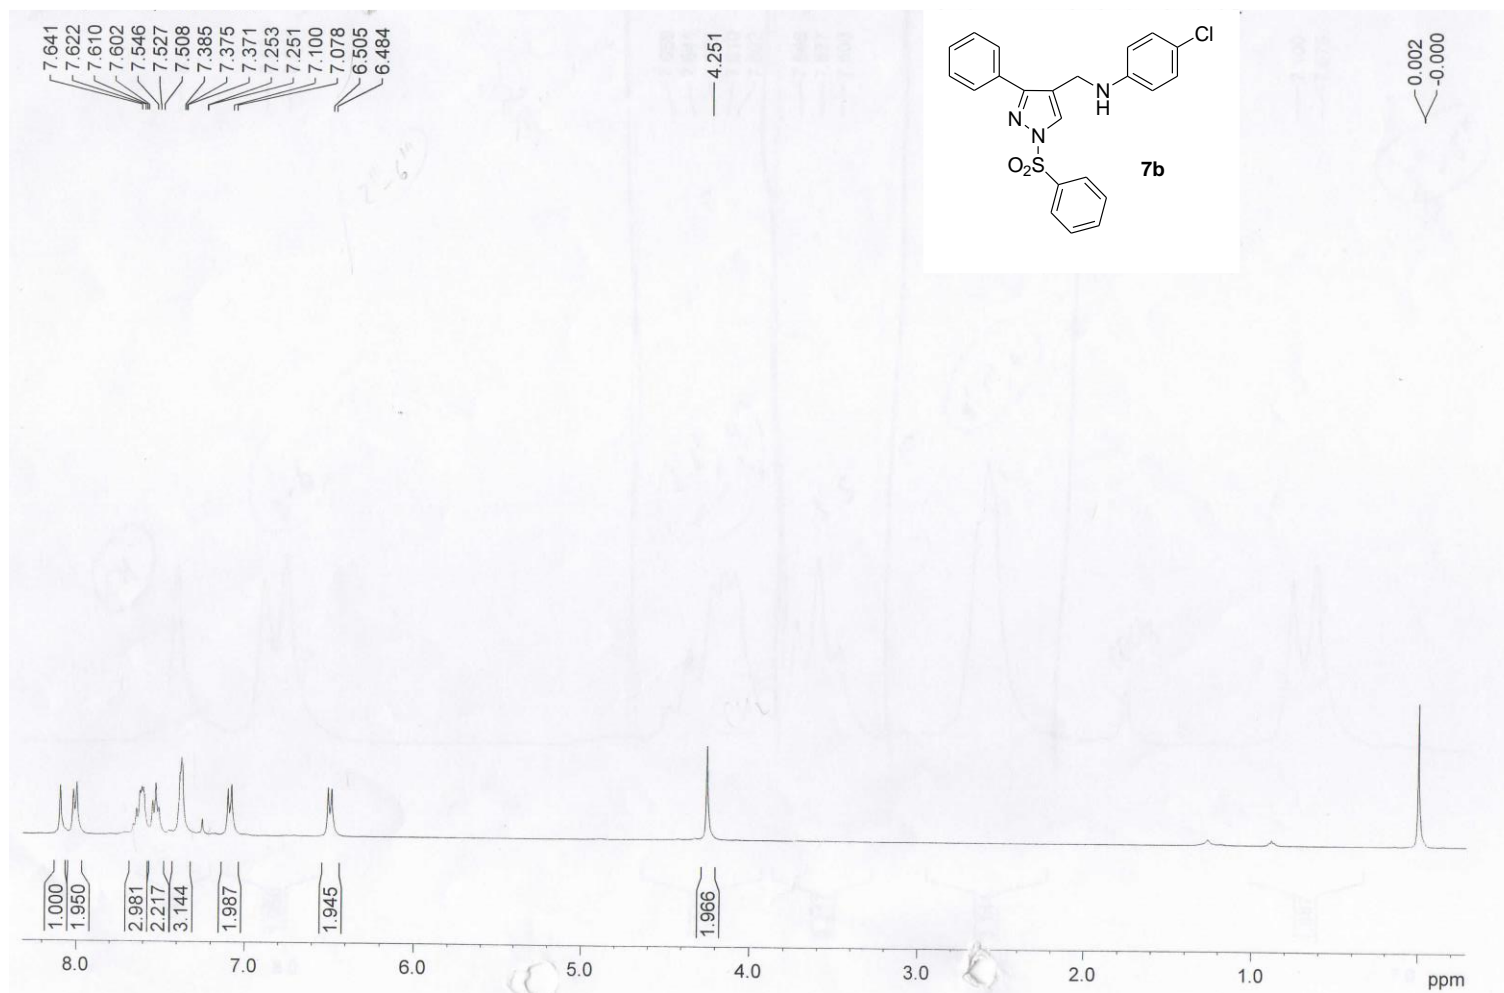

Fig. S 2. <sup>1</sup>H NMR spectrum of compound **7b**

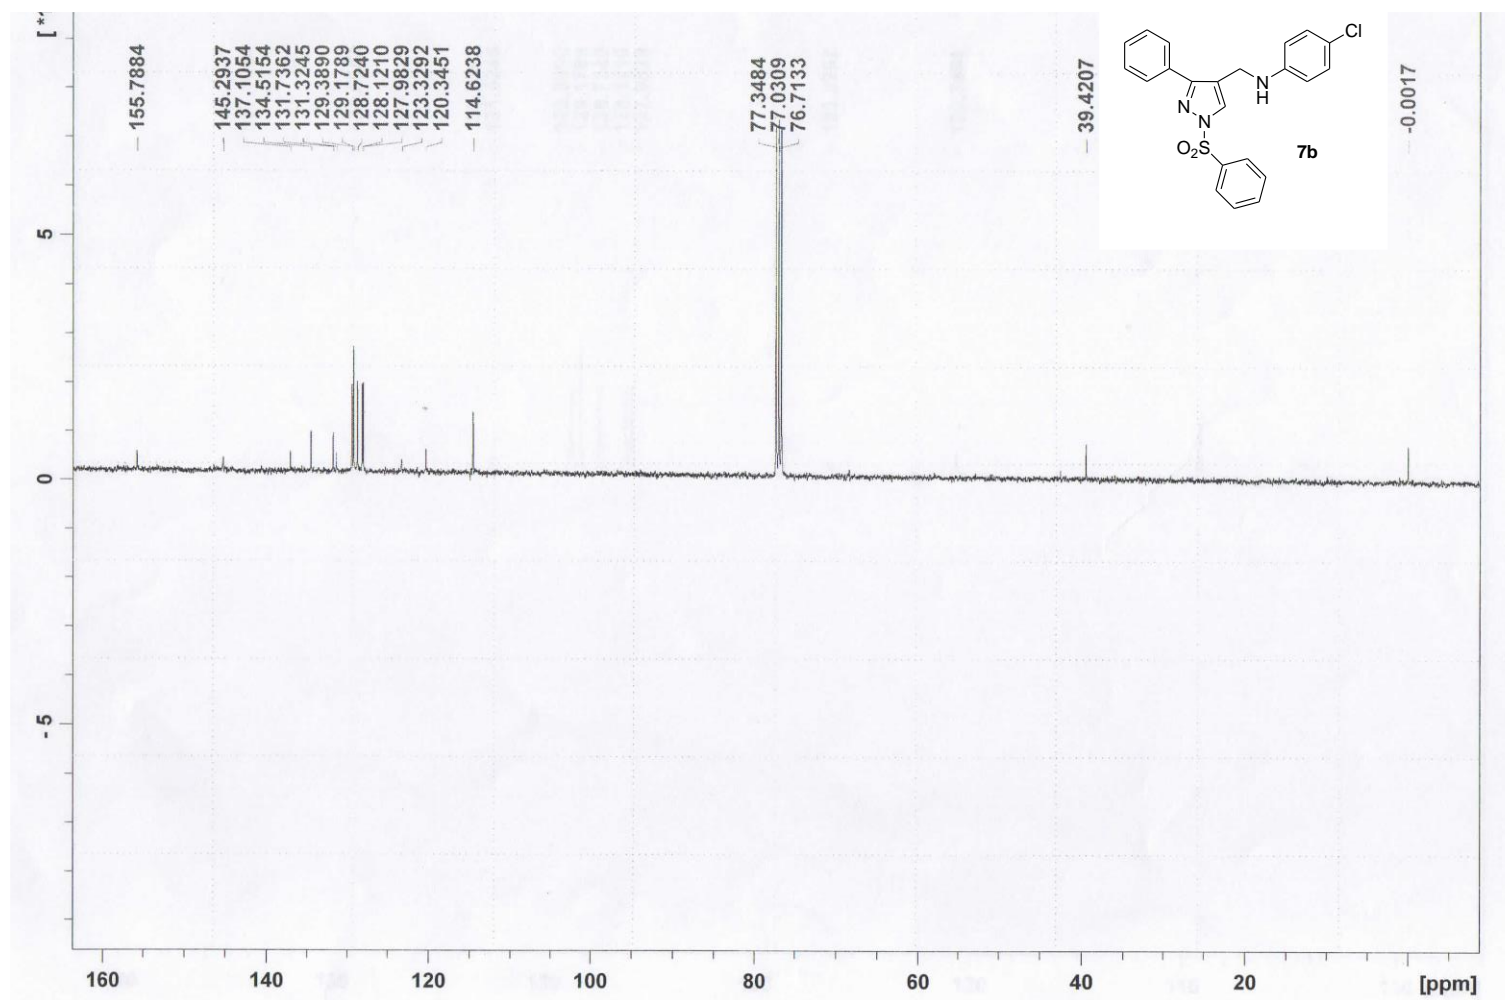

Fig. S 2.  $^{13}\text{C}$  NMR spectrum of compound **7b**



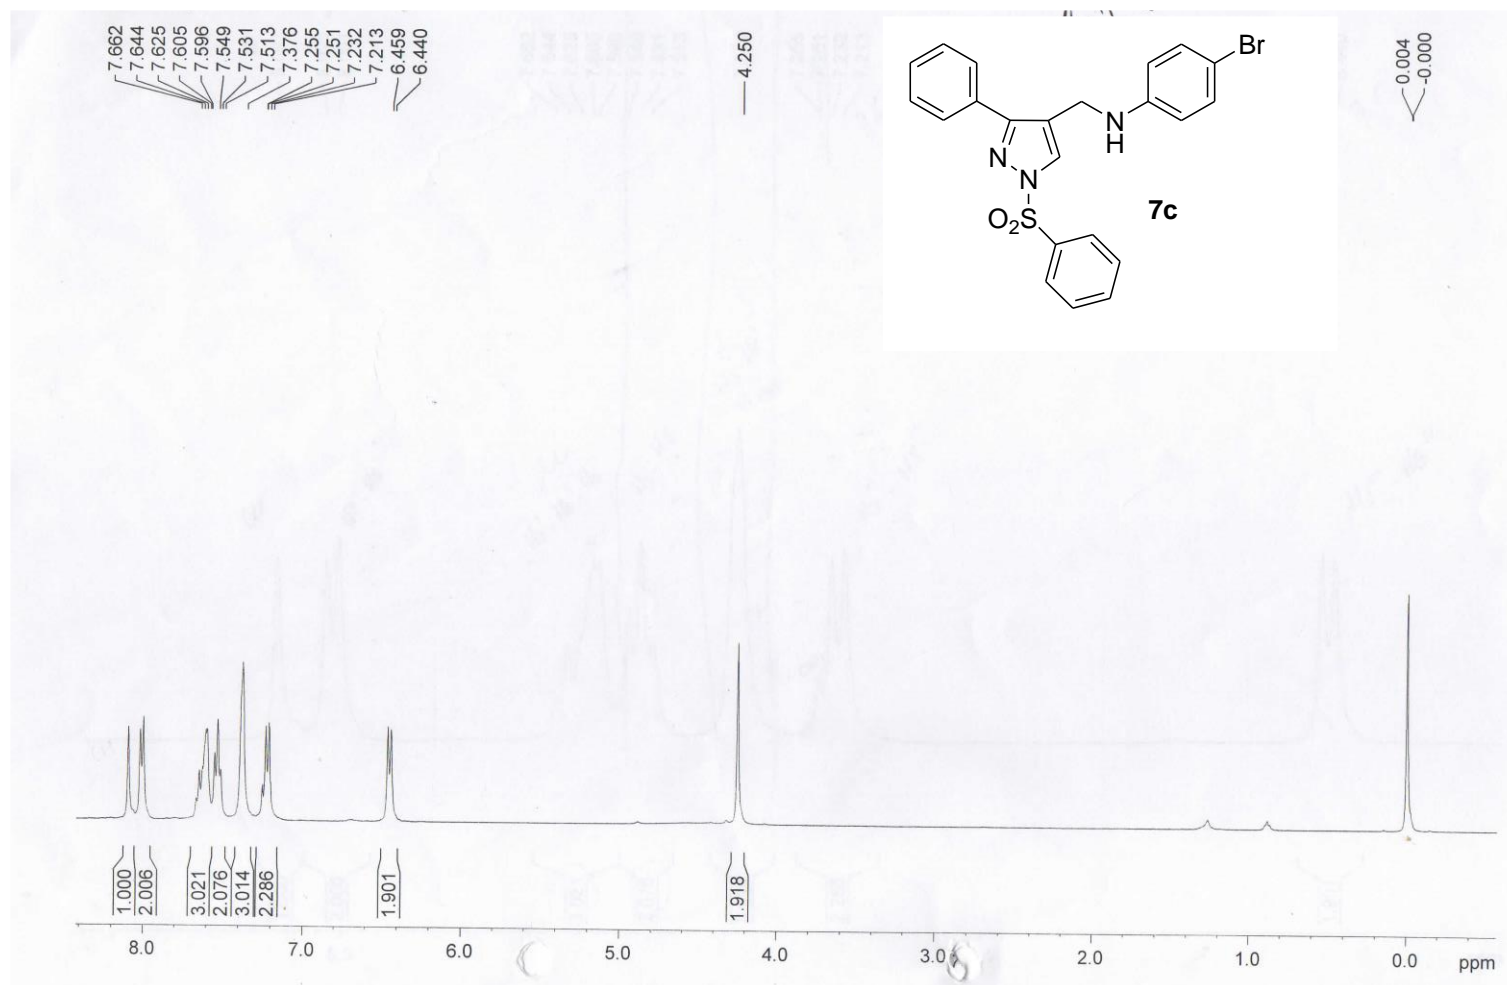

Fig. S 3.  $^1\text{H}$  NMR spectrum of compound **7c**

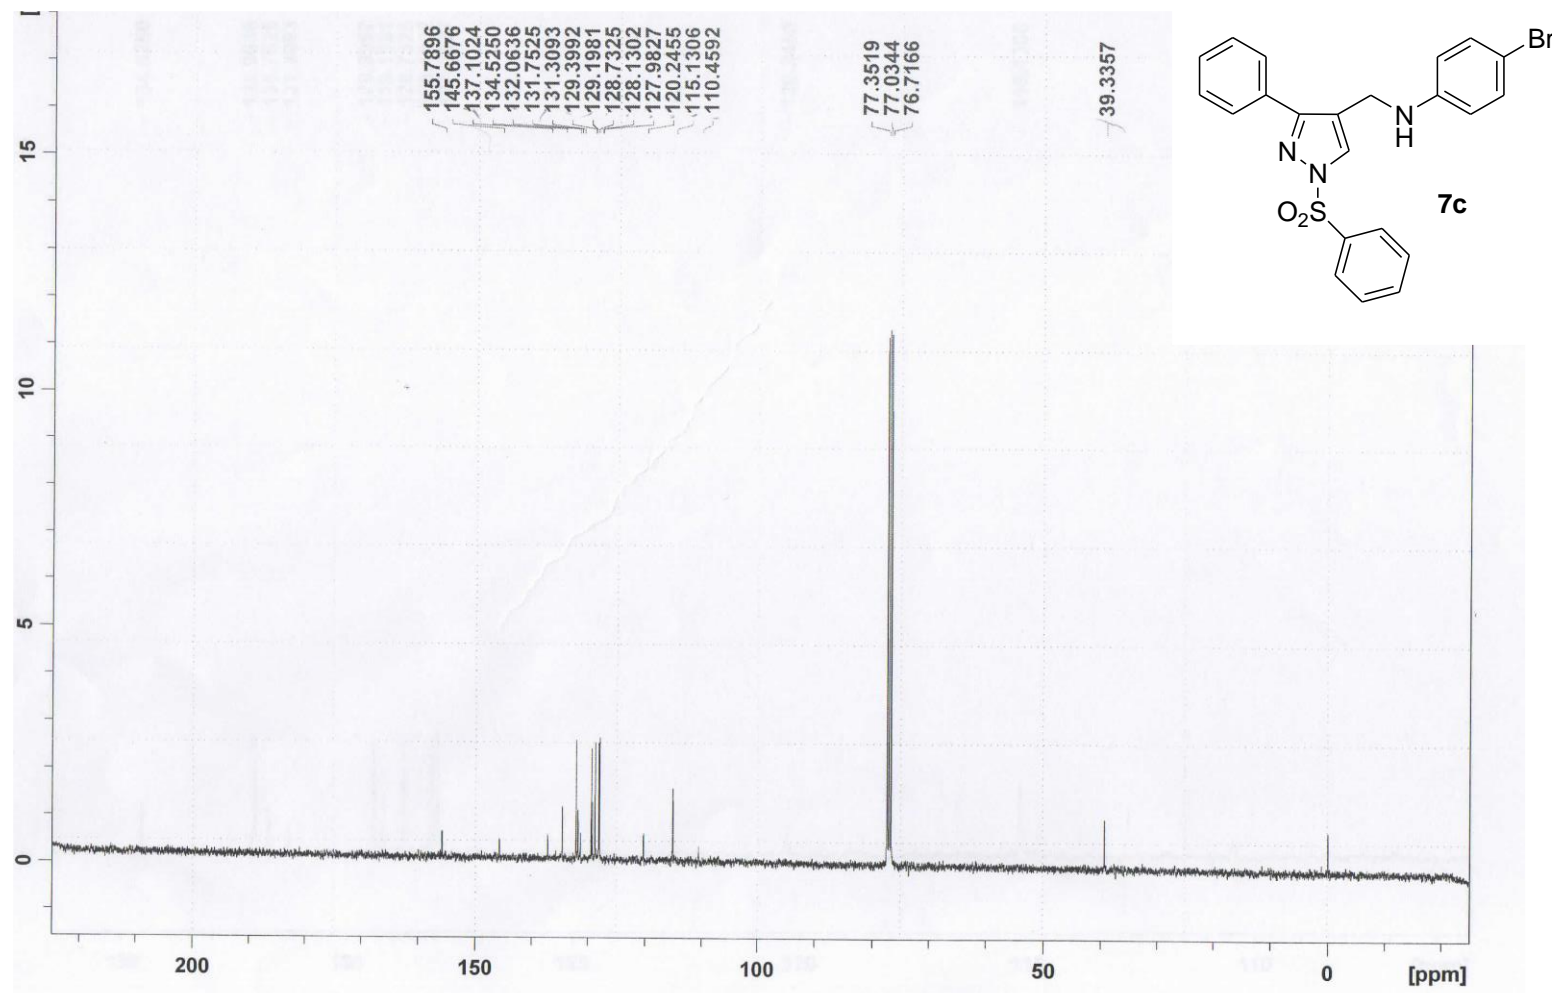

Fig. S 3.  $^{13}\text{C}$  NMR spectrum of compound **7c**

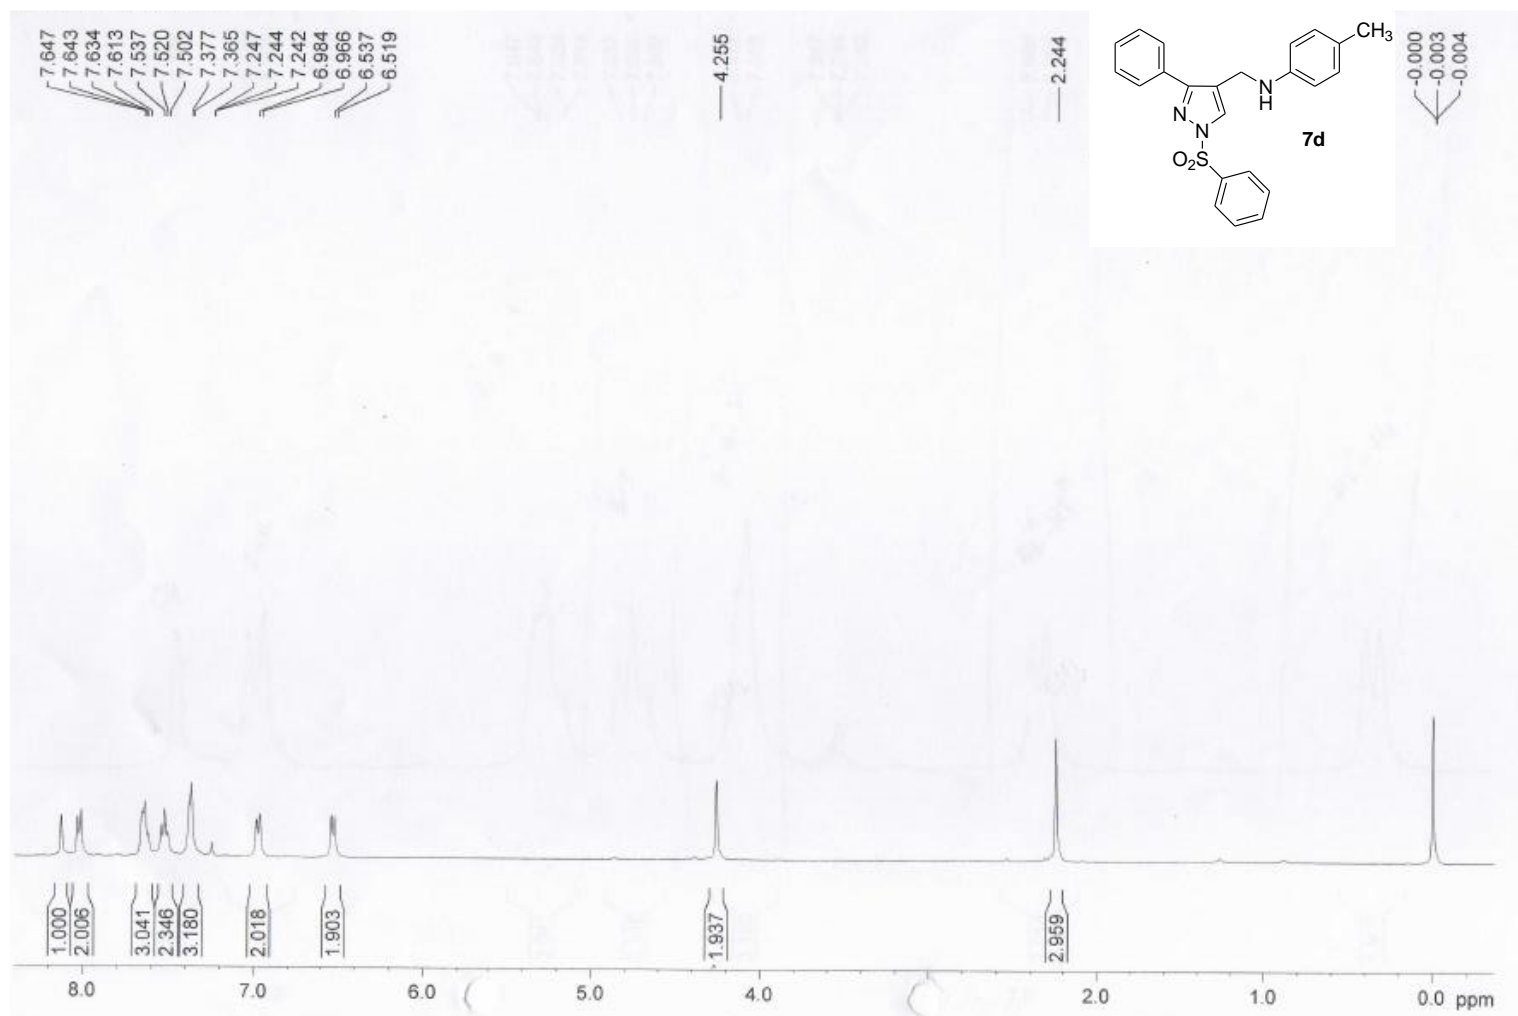

Fig. S 4. <sup>1</sup>H NMR of compound **7d**

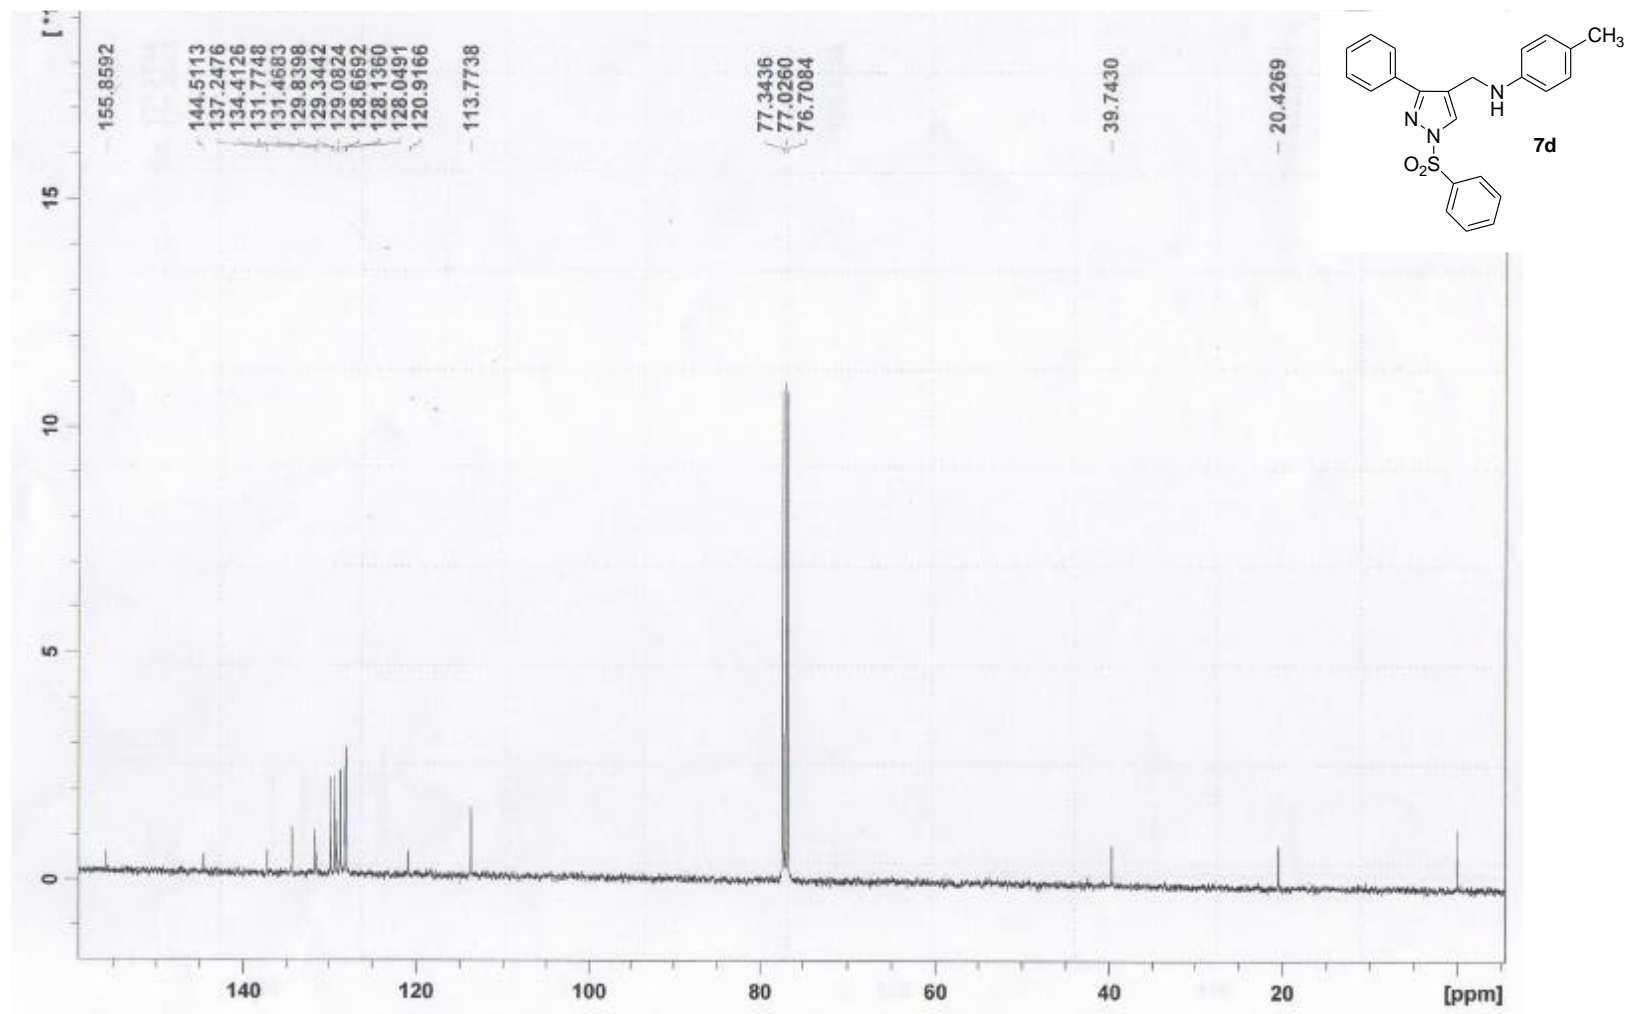

Fig. S 4.  $^{13}\text{C}$  NMR of compound **7d**

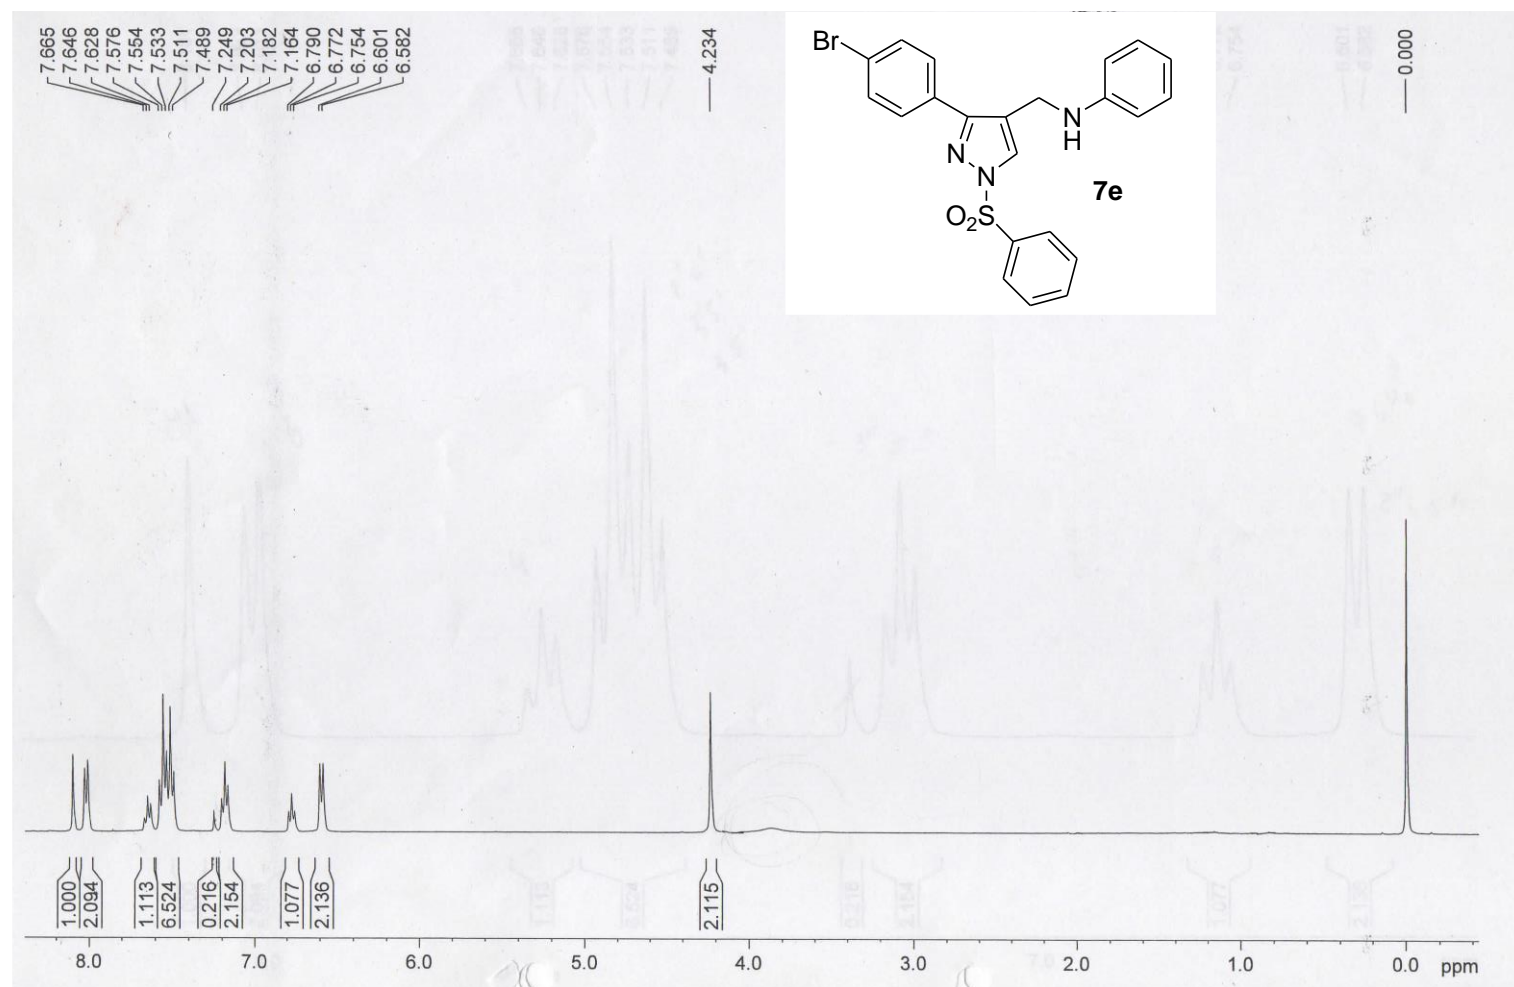

Fig. S5.  $^1\text{H}$  NMR spectrum of compound **7e**

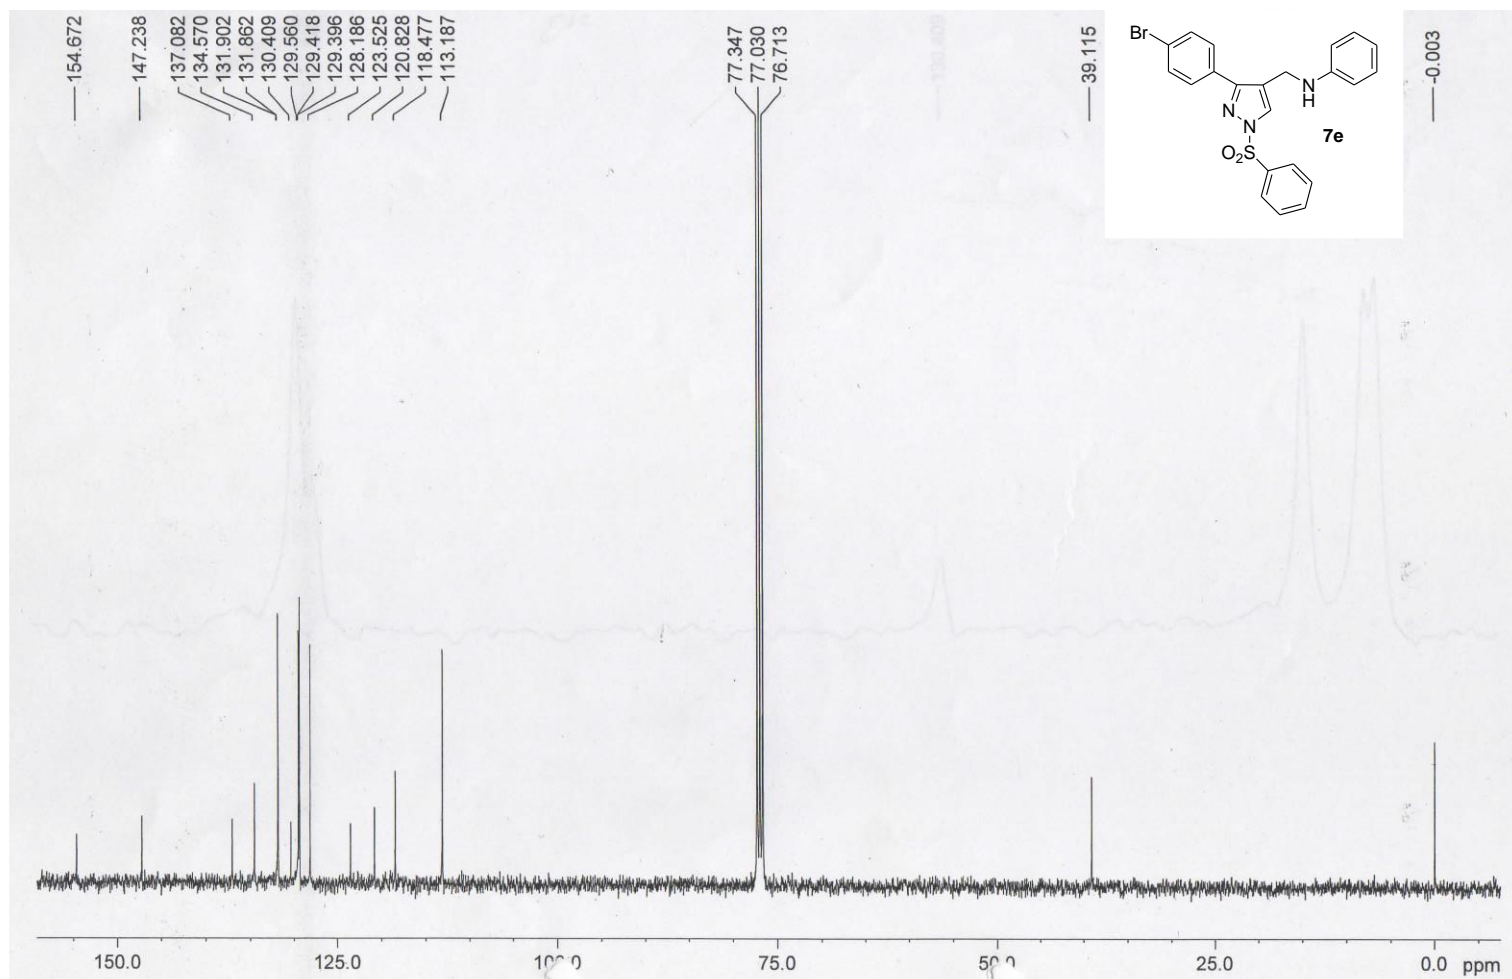

Fig. S5. <sup>13</sup>C NMR spectrum of compound **7e**

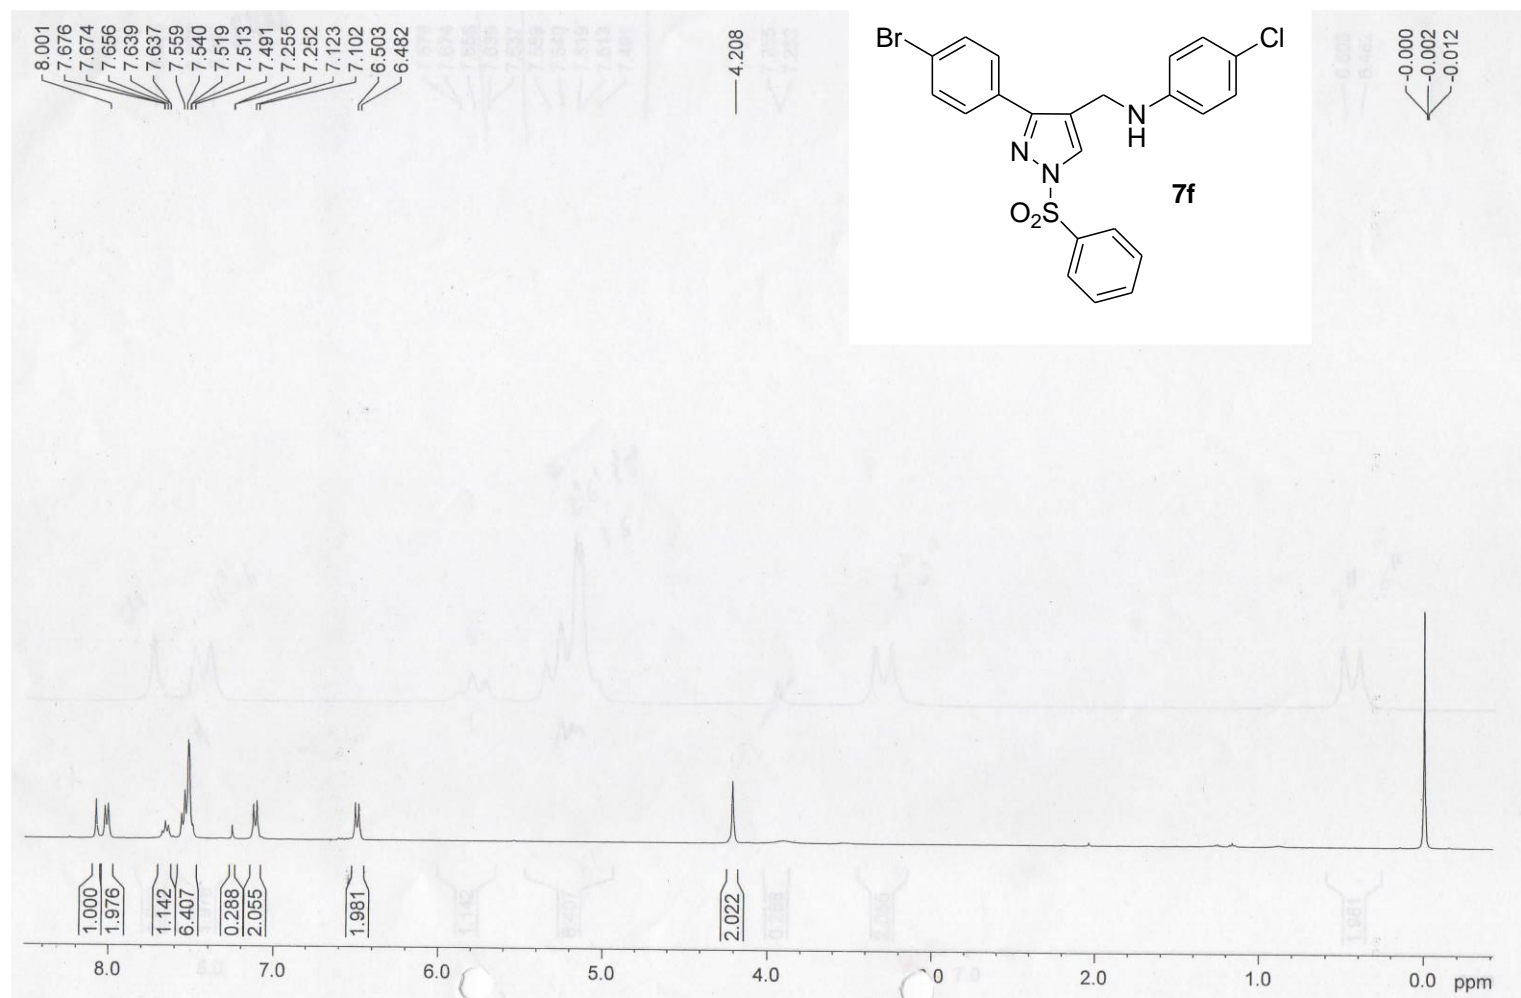

Fig. S6.  $^1\text{H}$  NMR spectrum of compound **7f**



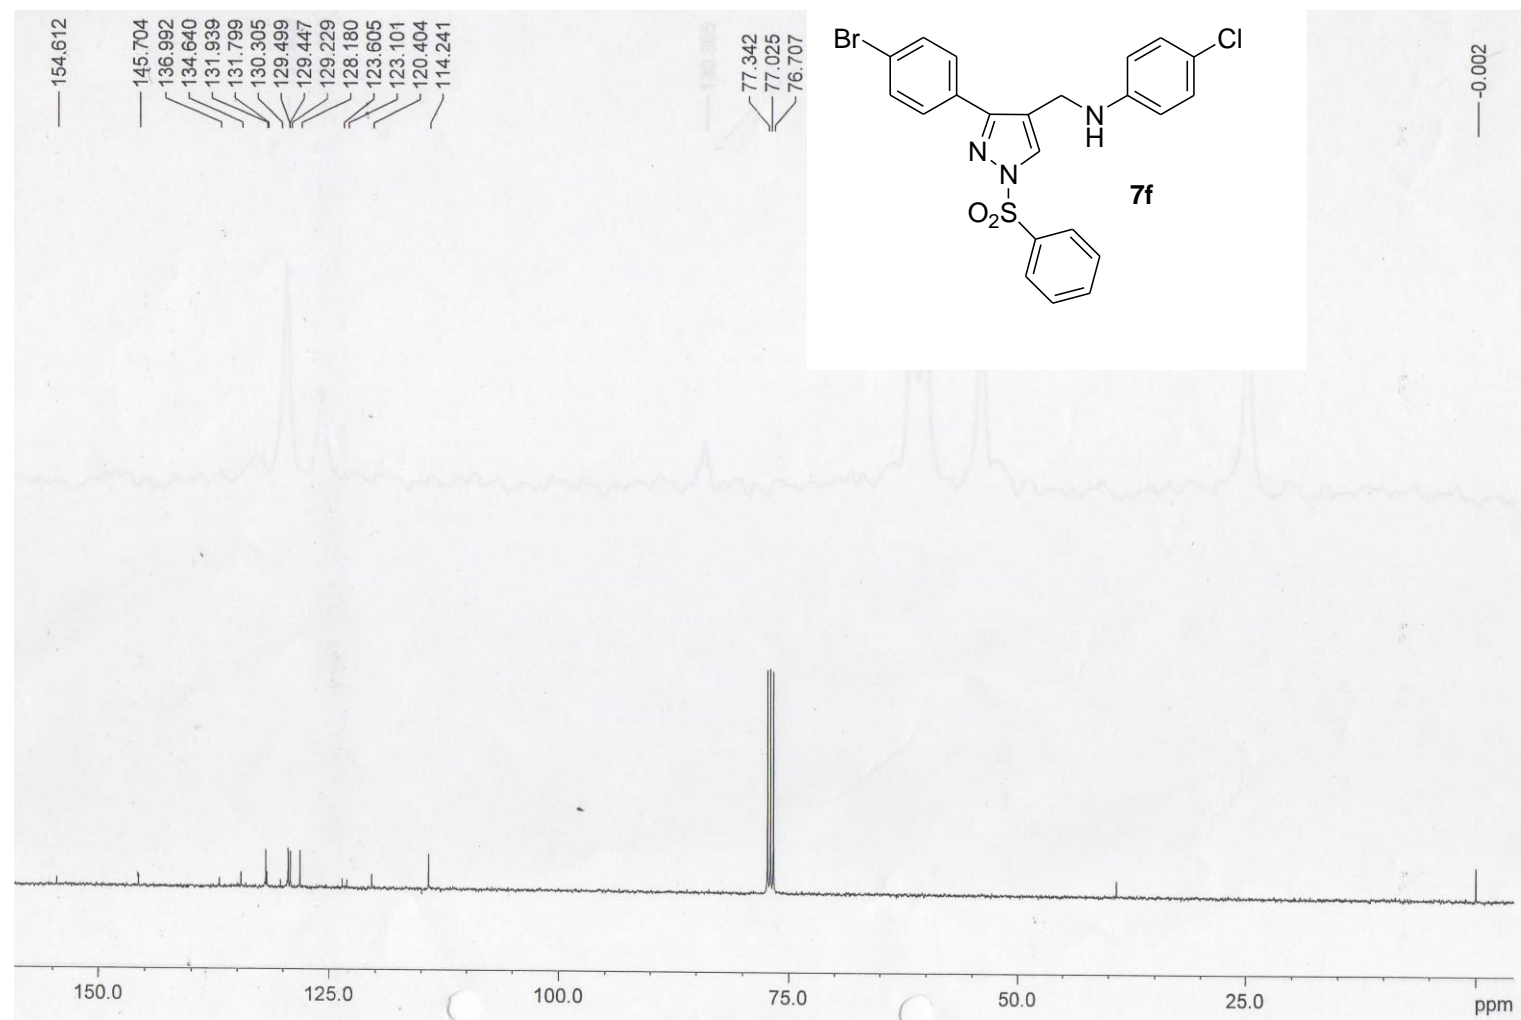

Fig. S6.  $^{13}\text{C}$  NMR spectrum of compound **7f**

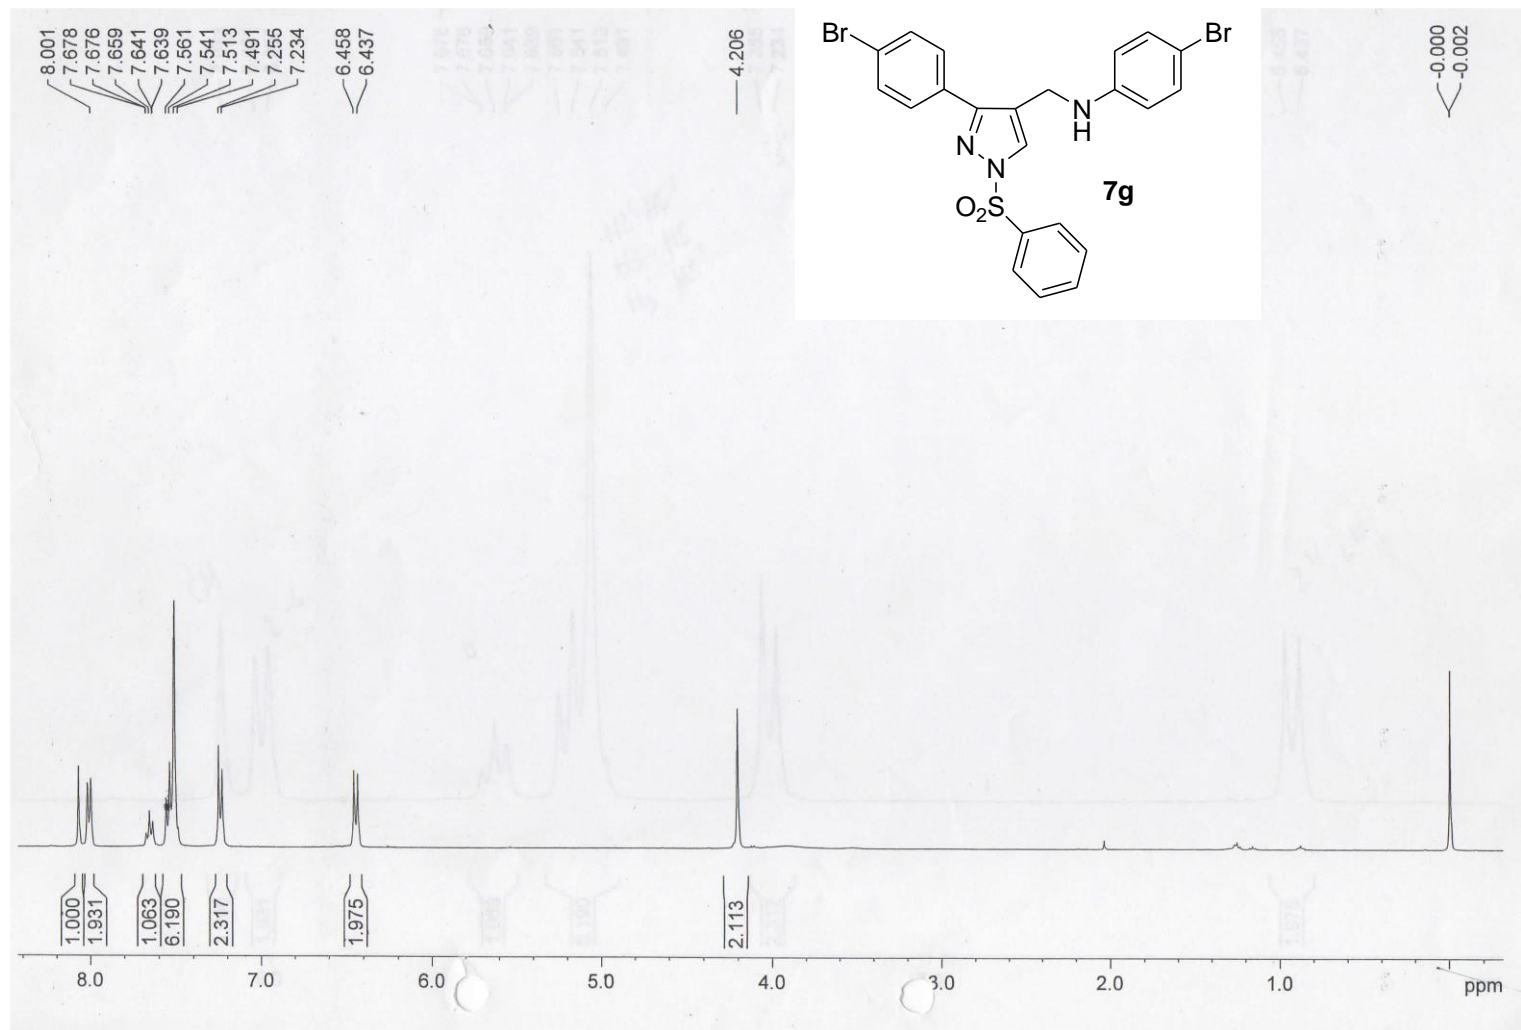

Fig. S7. <sup>1</sup>H NMR spectrum of compound **7g**

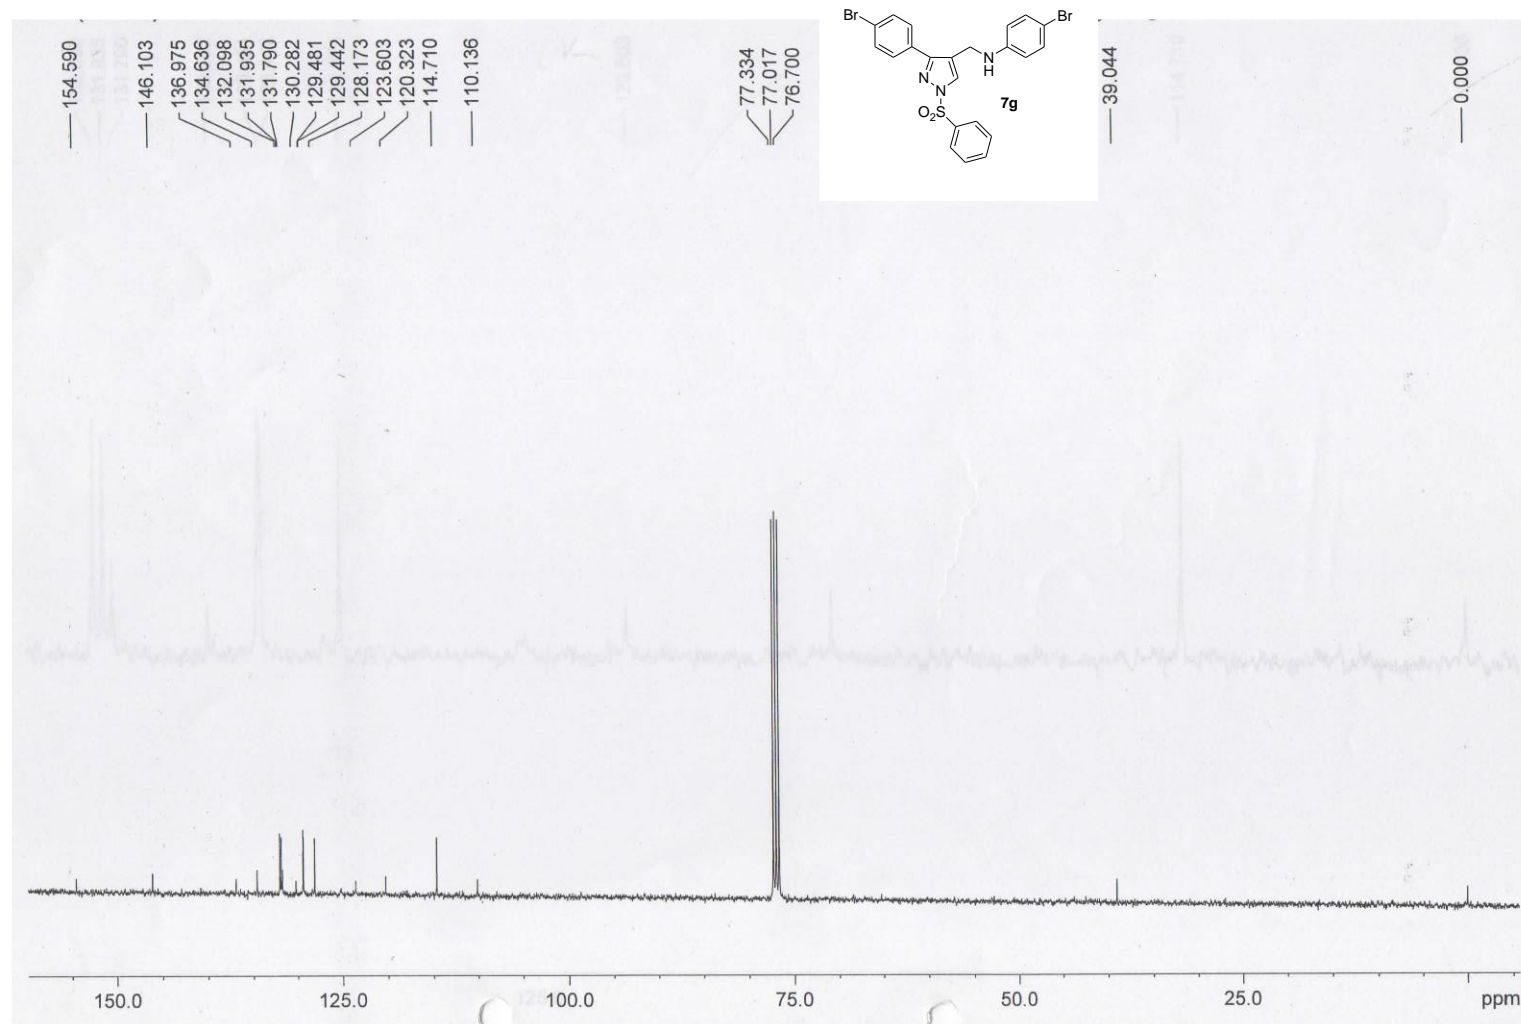

Fig. S7. <sup>13</sup>C NMR spectrum of compound **7g**

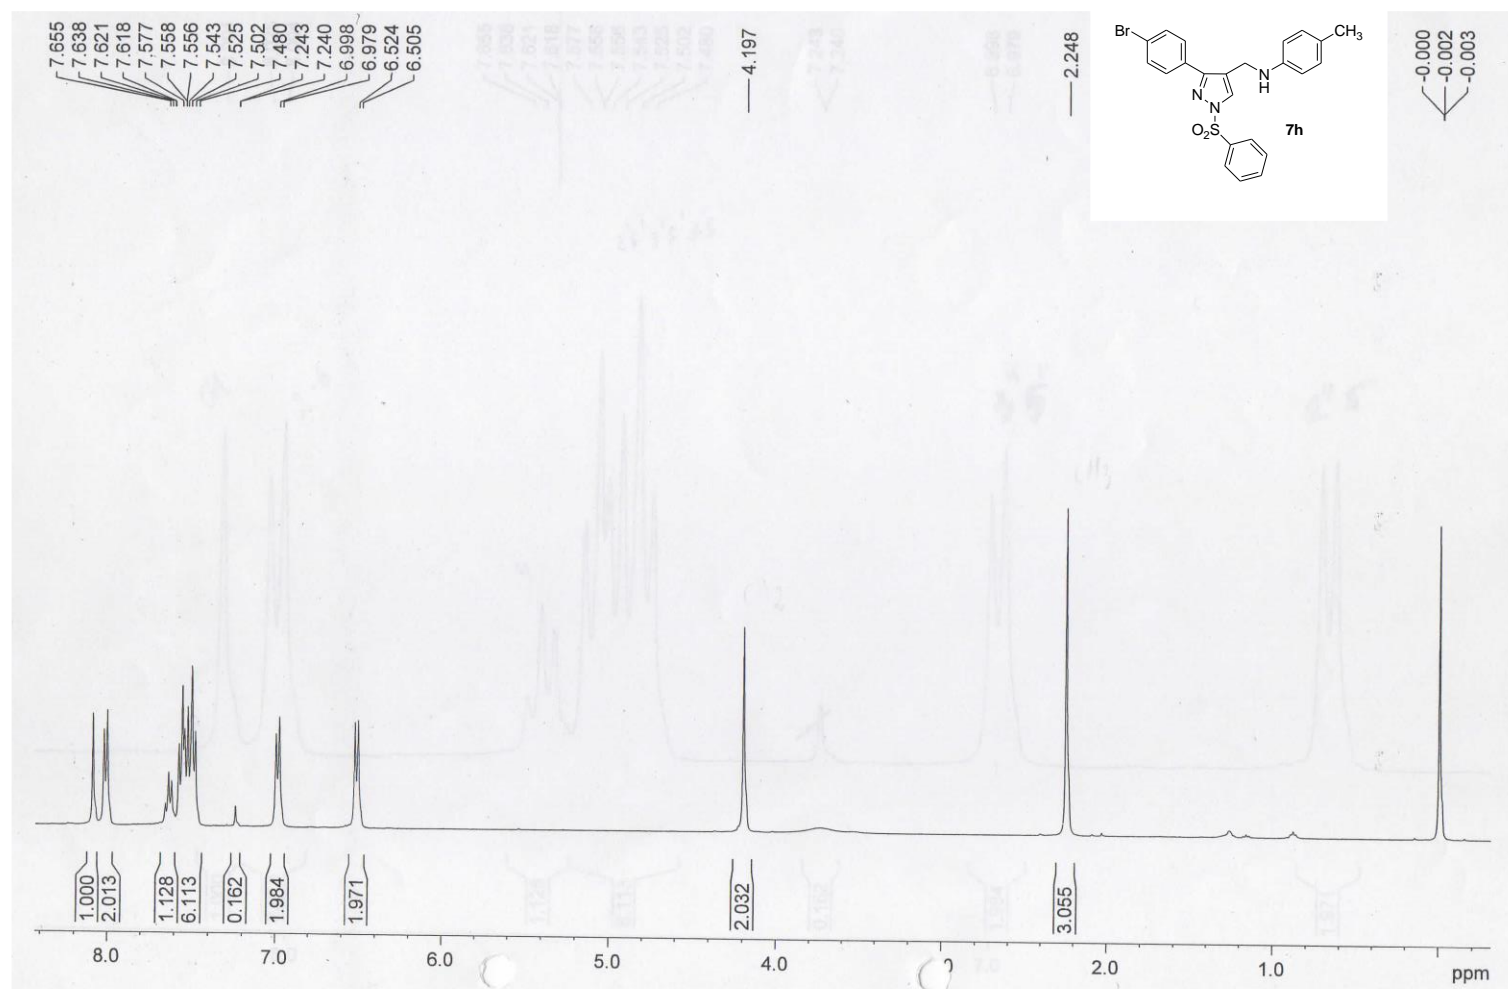

Fig. S8. <sup>1</sup>H NMR spectrum of compound **7h**

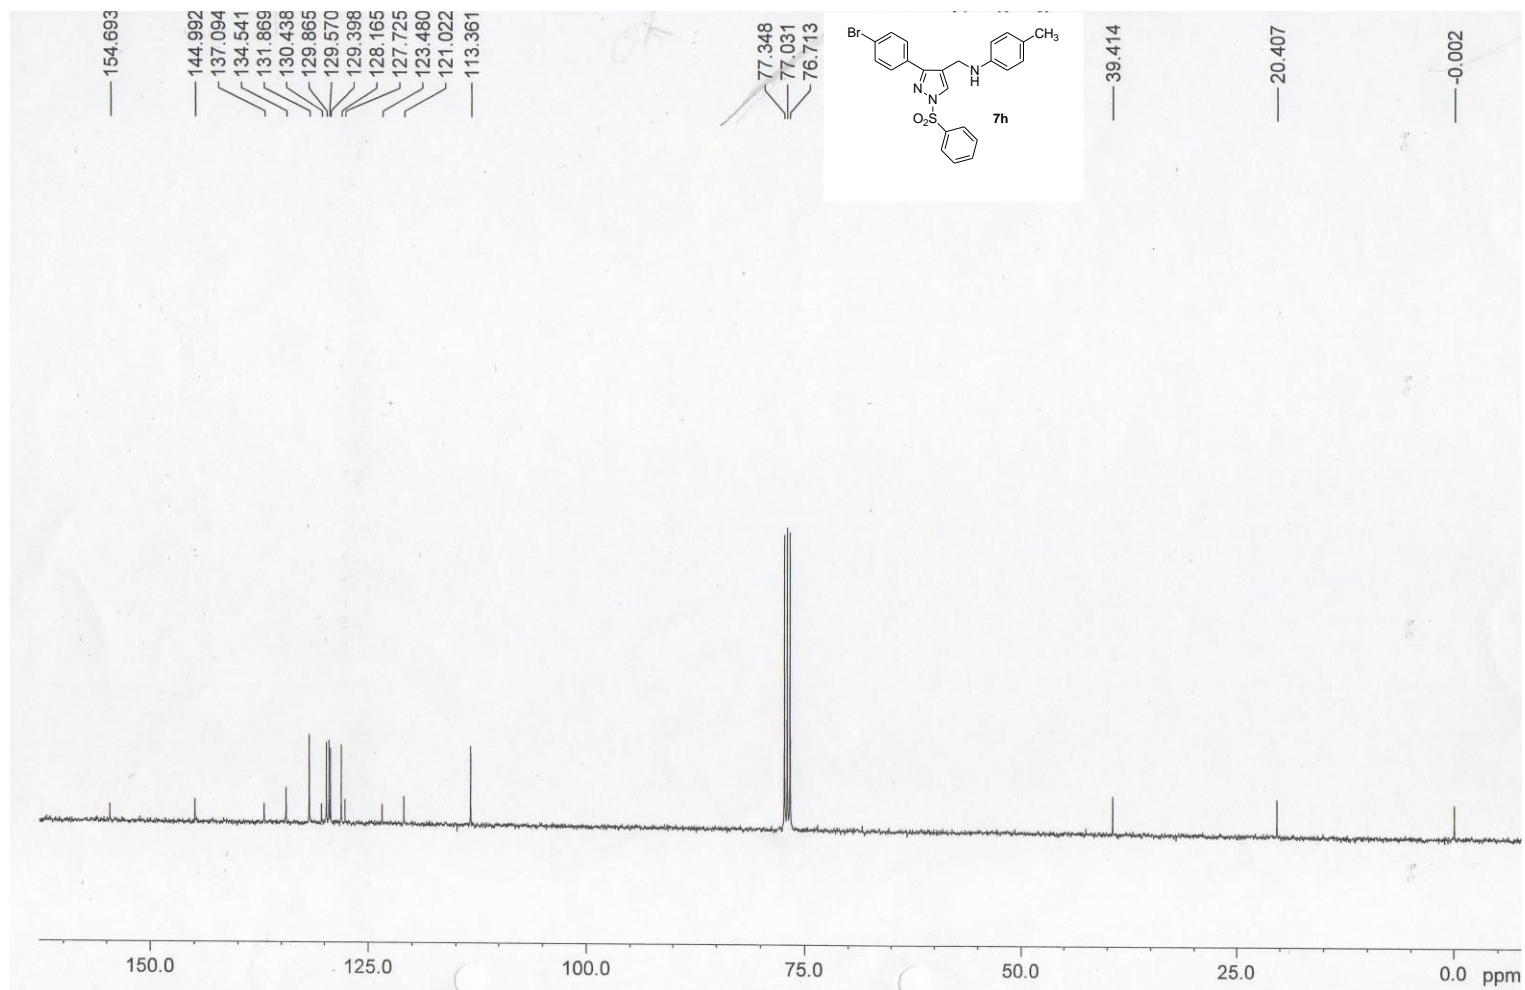

Fig. S8. <sup>13</sup>C NMR spectrum of compound **7h**

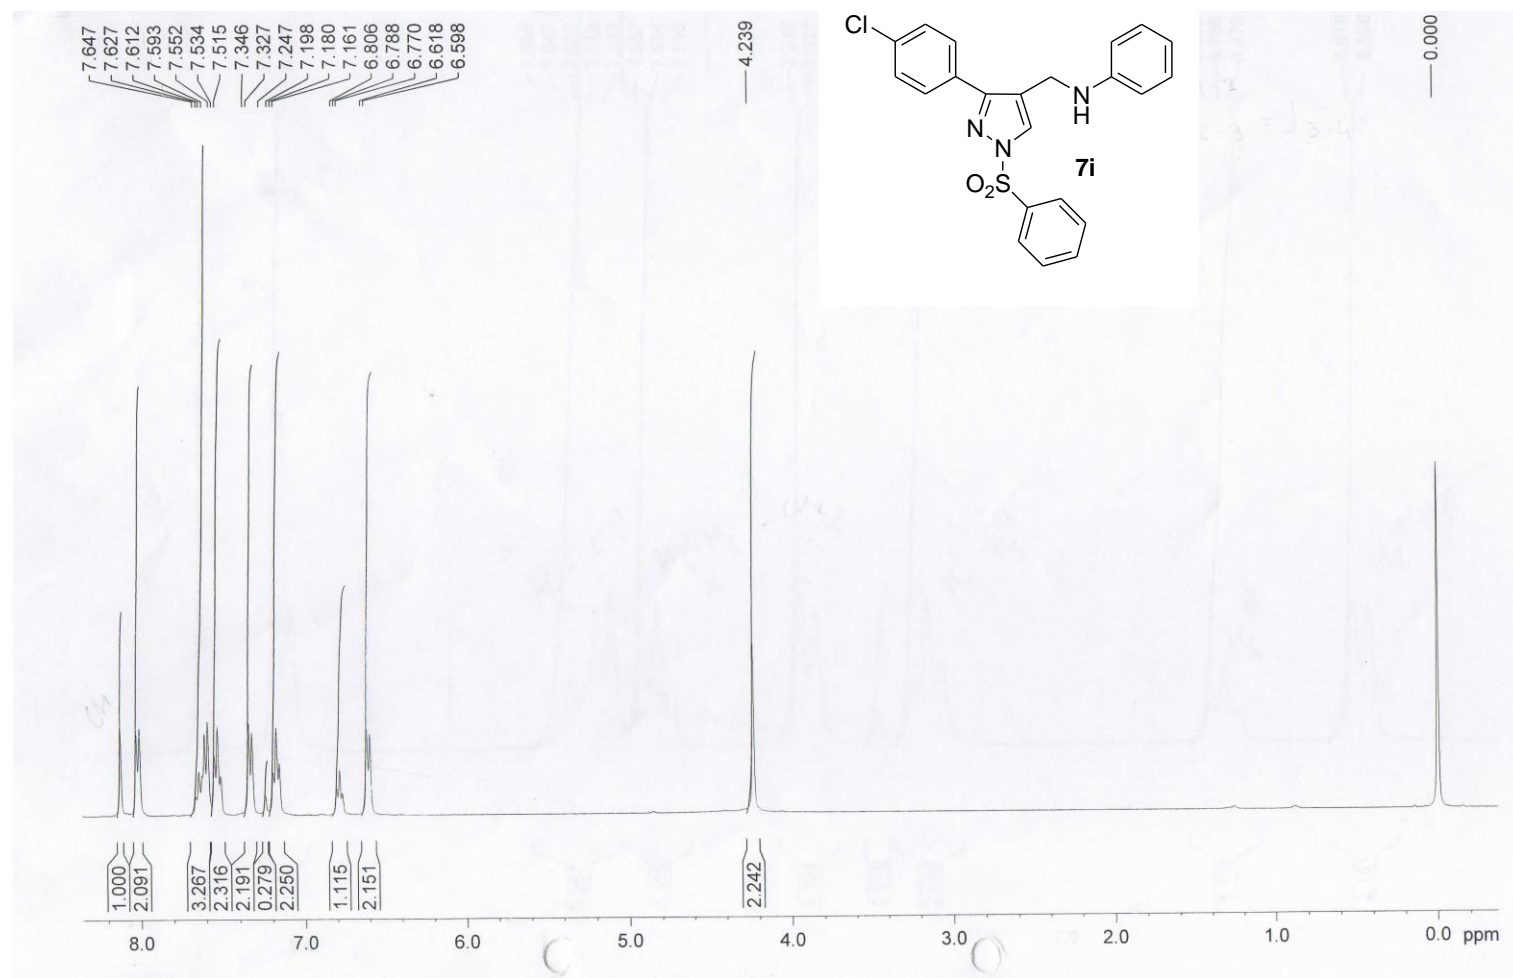

Fig. S9. <sup>1</sup>H NMR spectrum of compound **7i**



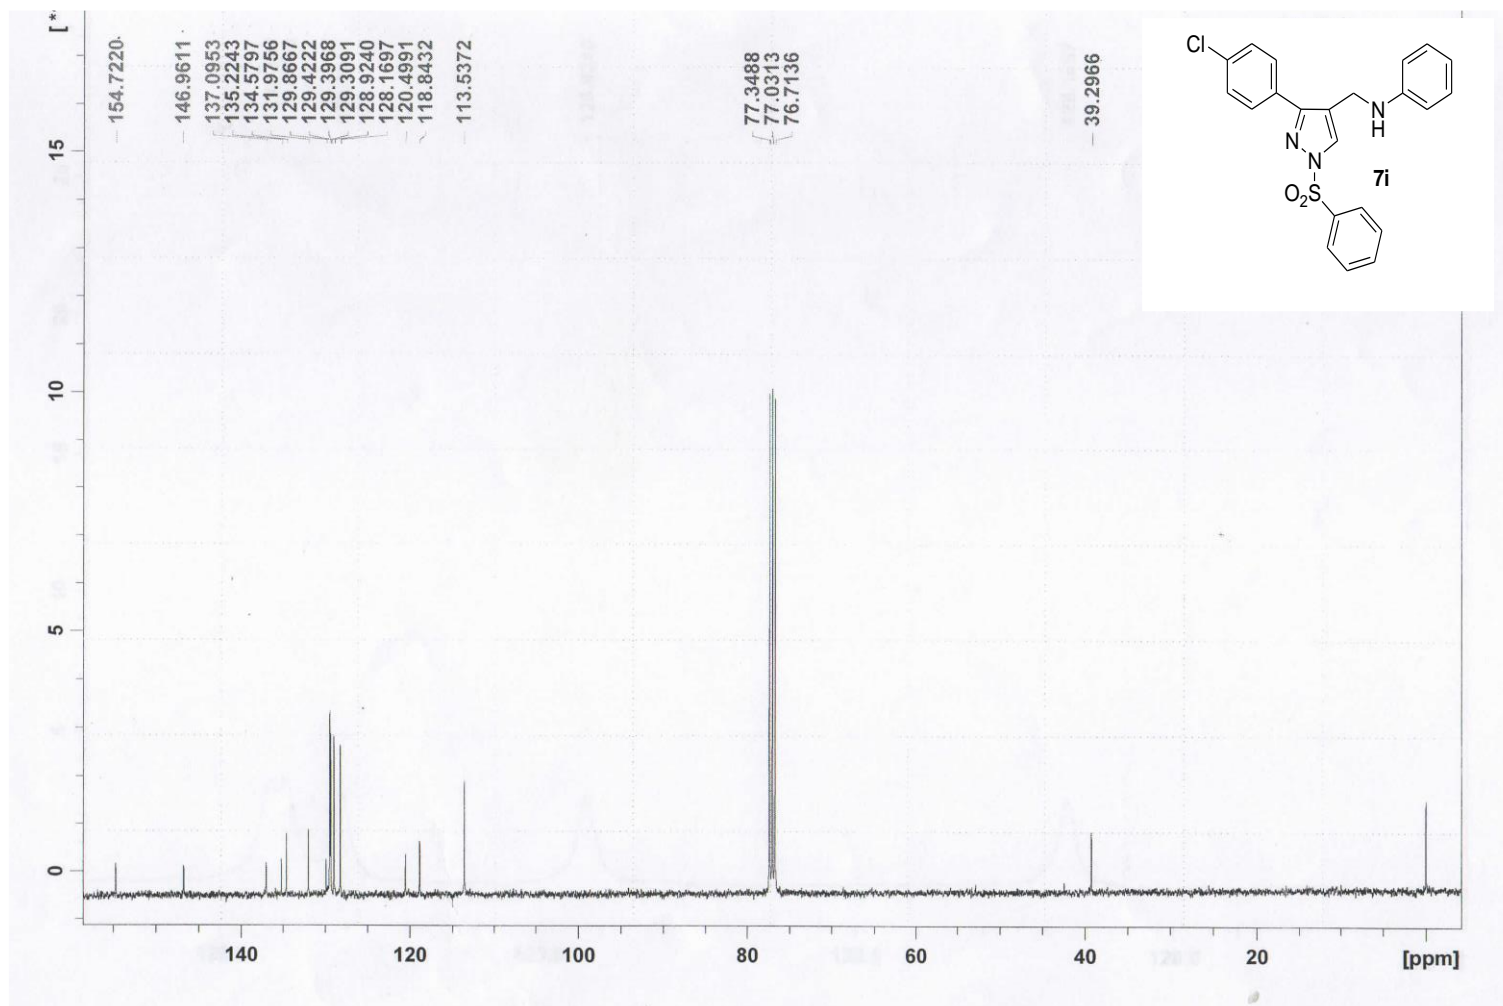

Fig. S9. <sup>13</sup>C NMR spectrum of compound **7i**



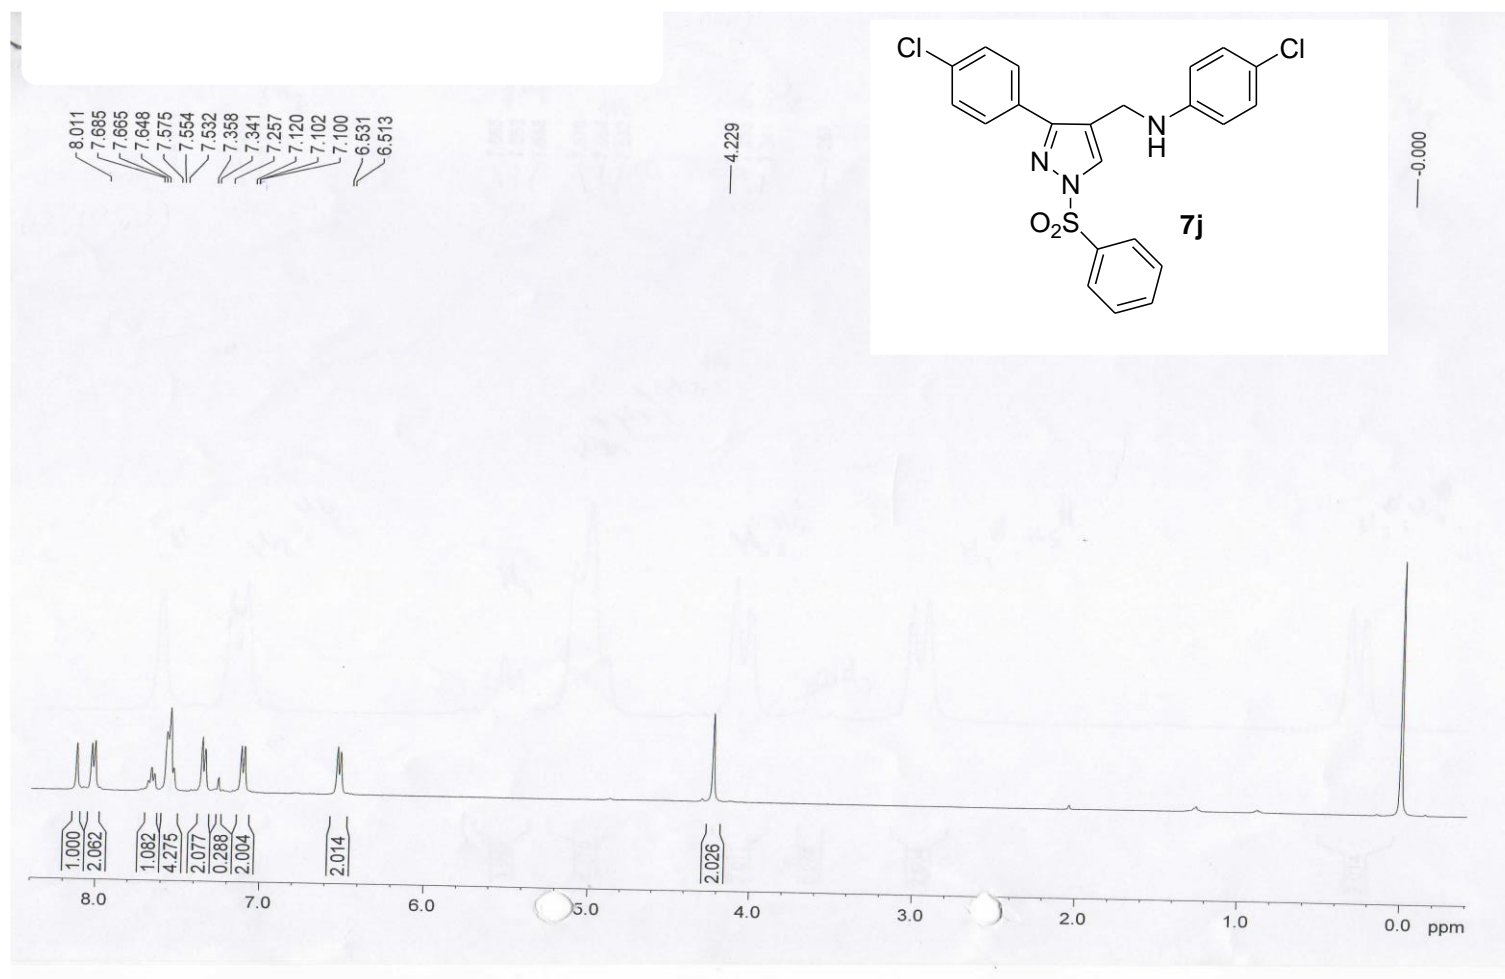

Fig S 10.  $^1\text{H}$  NMR spectrum of compound **7j**

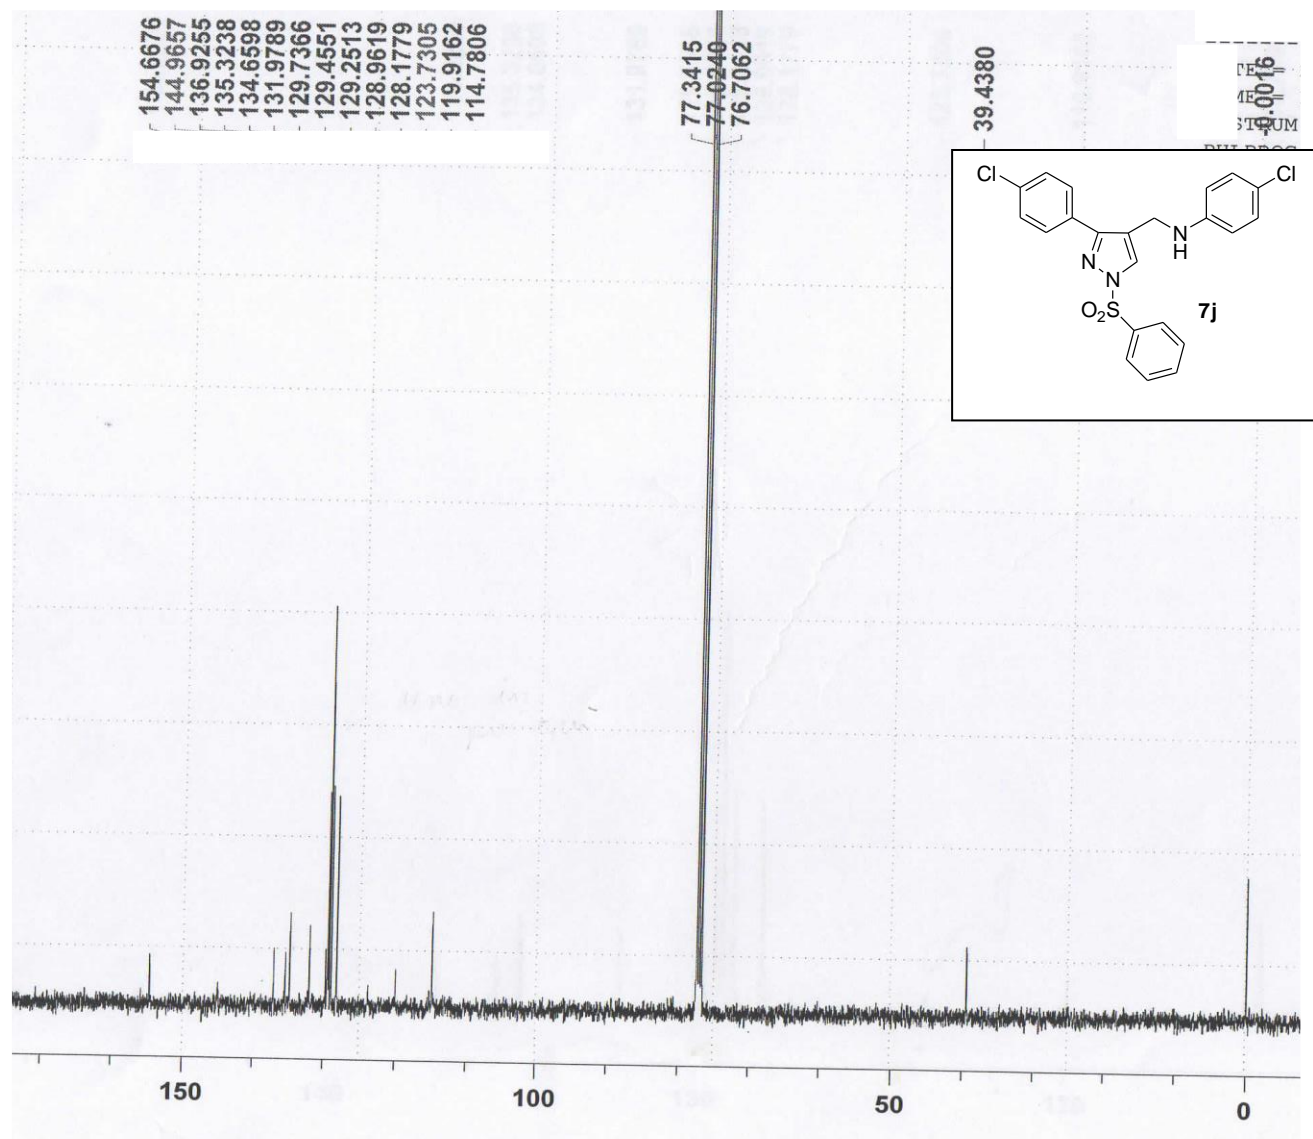

Fig S 10.  $^{13}\text{C}$  NMR spectrum of compound **7j**

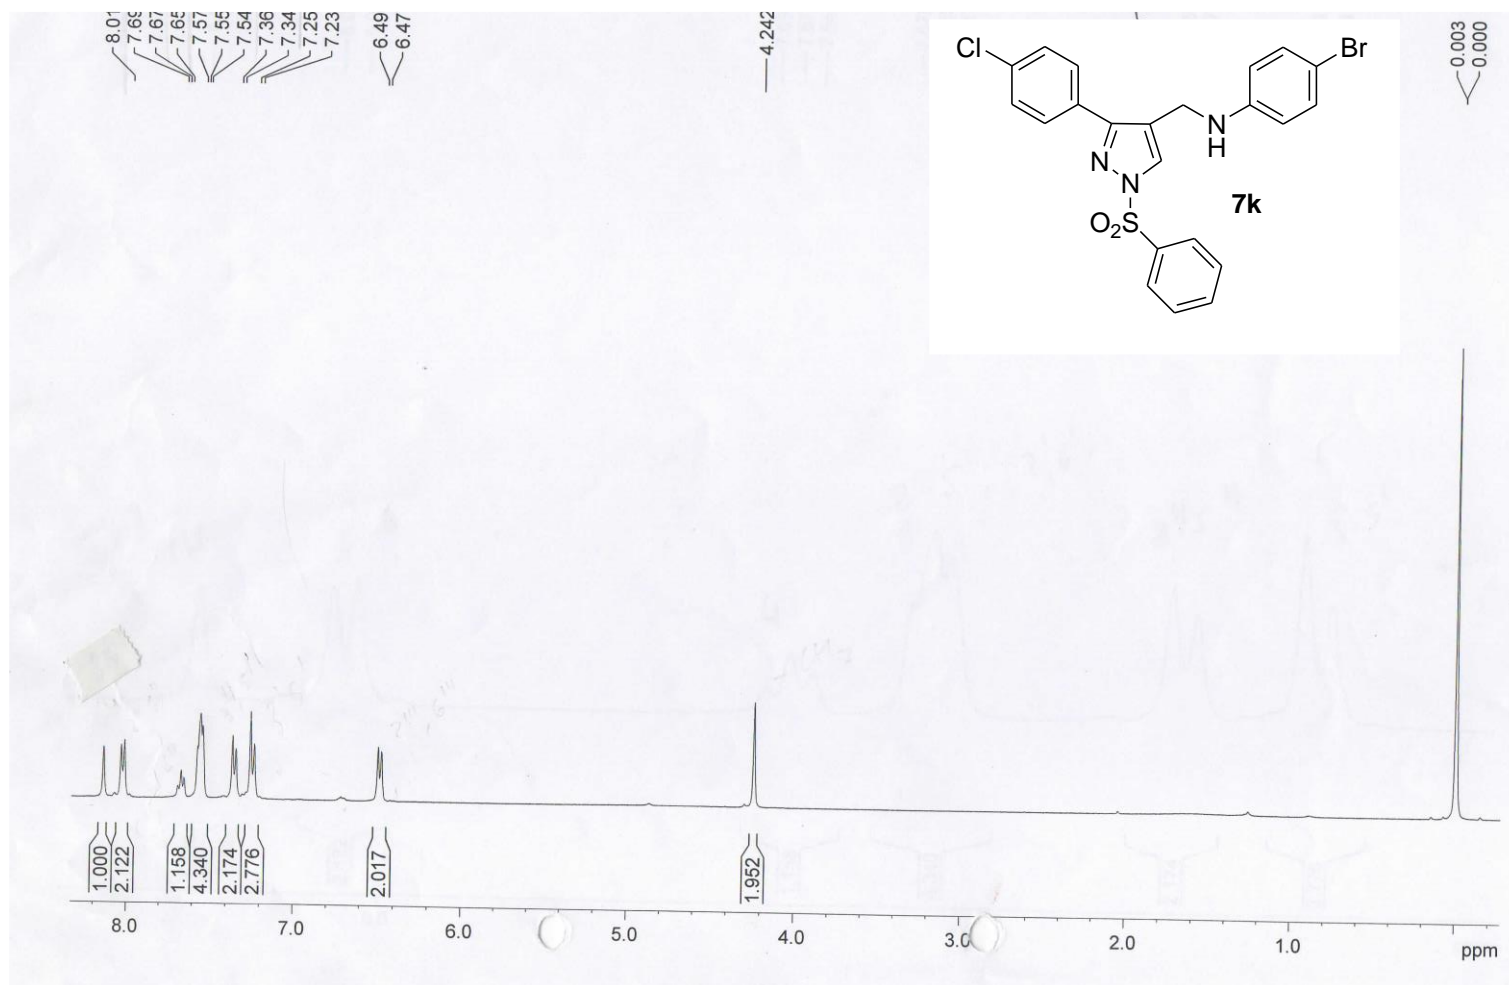

Fig. S 11.  $^1\text{H}$  NMR spectrum of compound **7k**

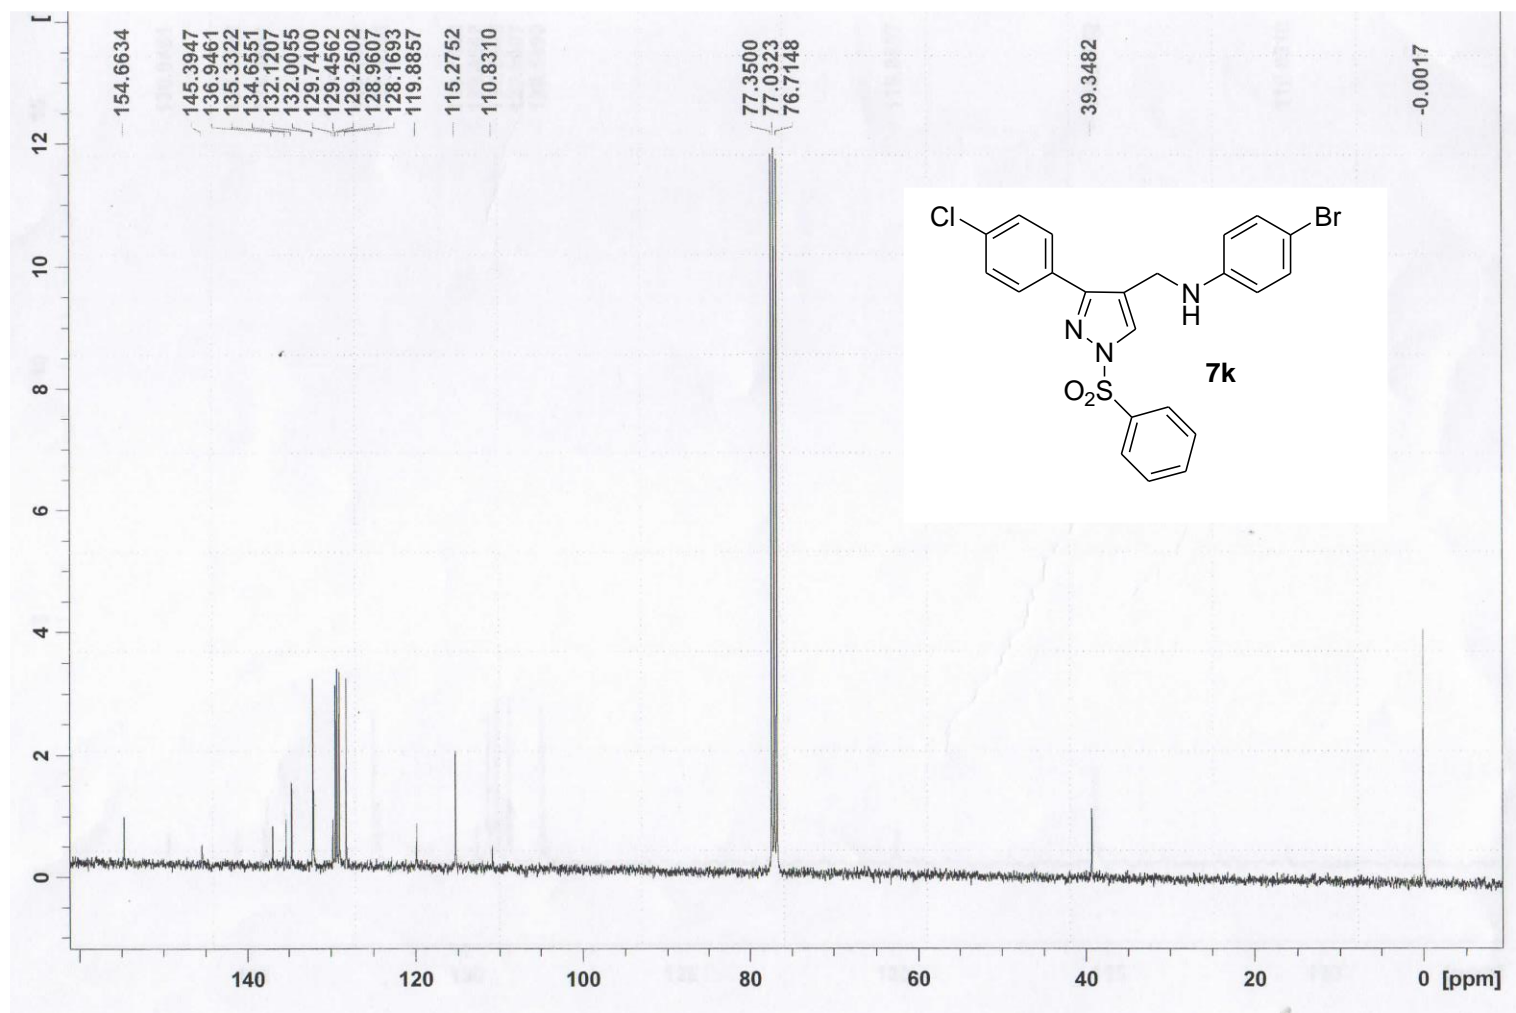

Fig. S 11.  $^{13}\text{C}$  NMR spectrum of compound **7k**

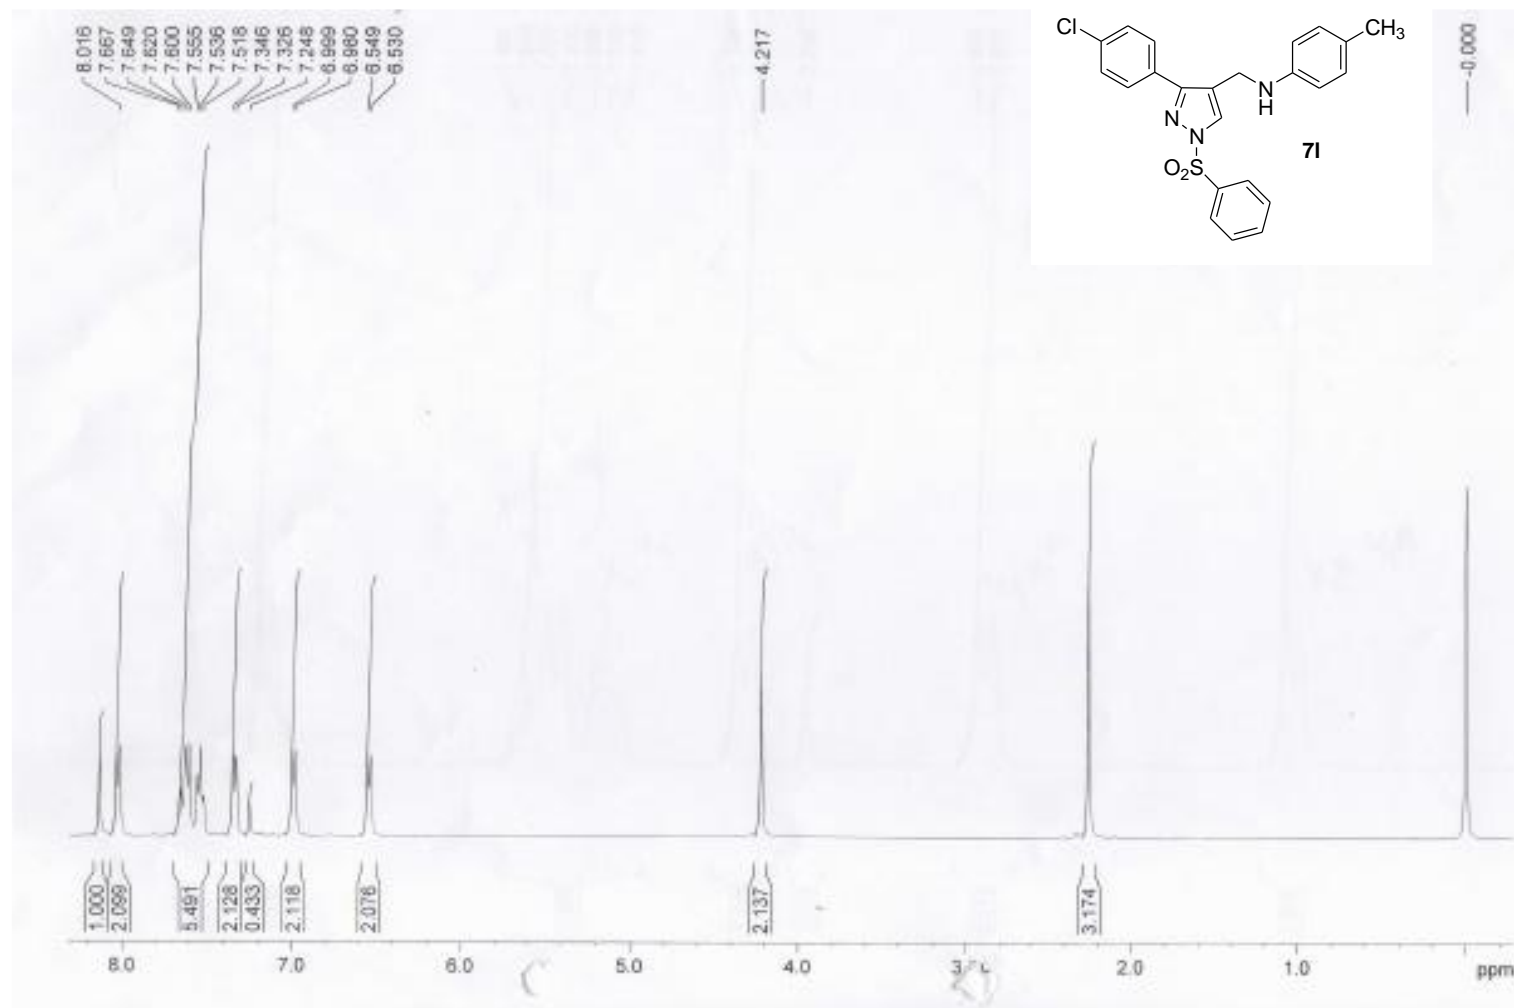

Fig. S 12. <sup>1</sup>H NMR spectrum of compound **7I**

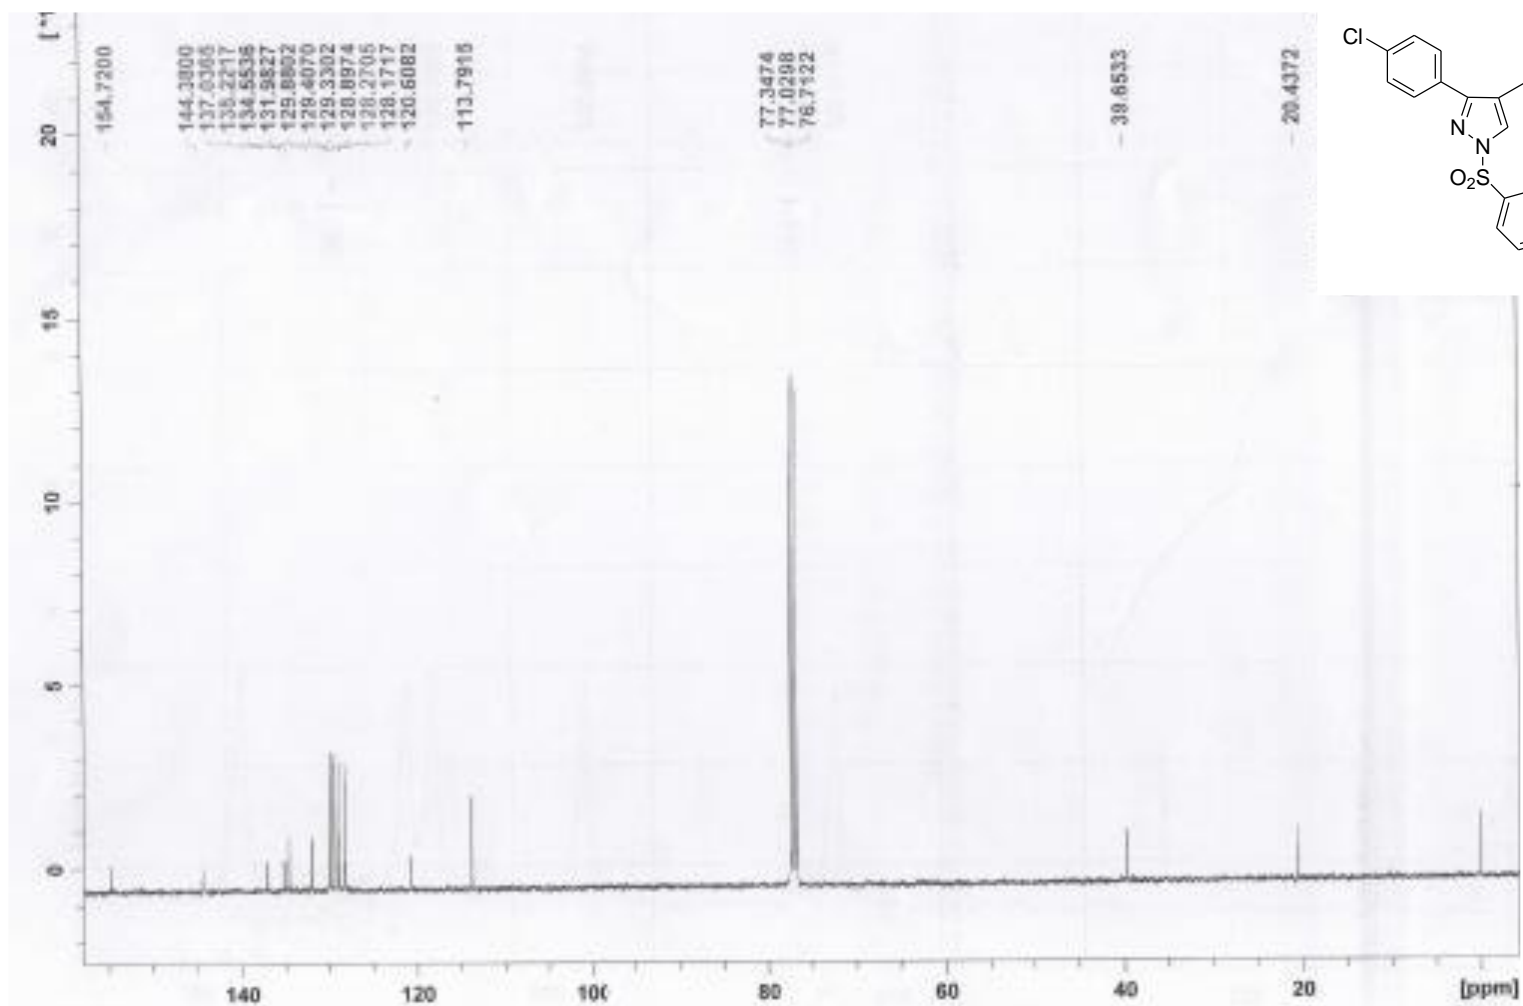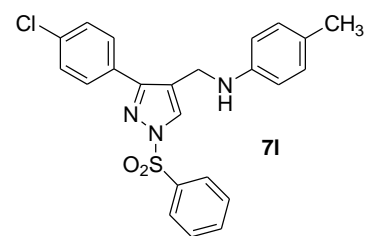

Fig. S 12.  $^{13}\text{C}$  NMR spectrum of compound **7l**

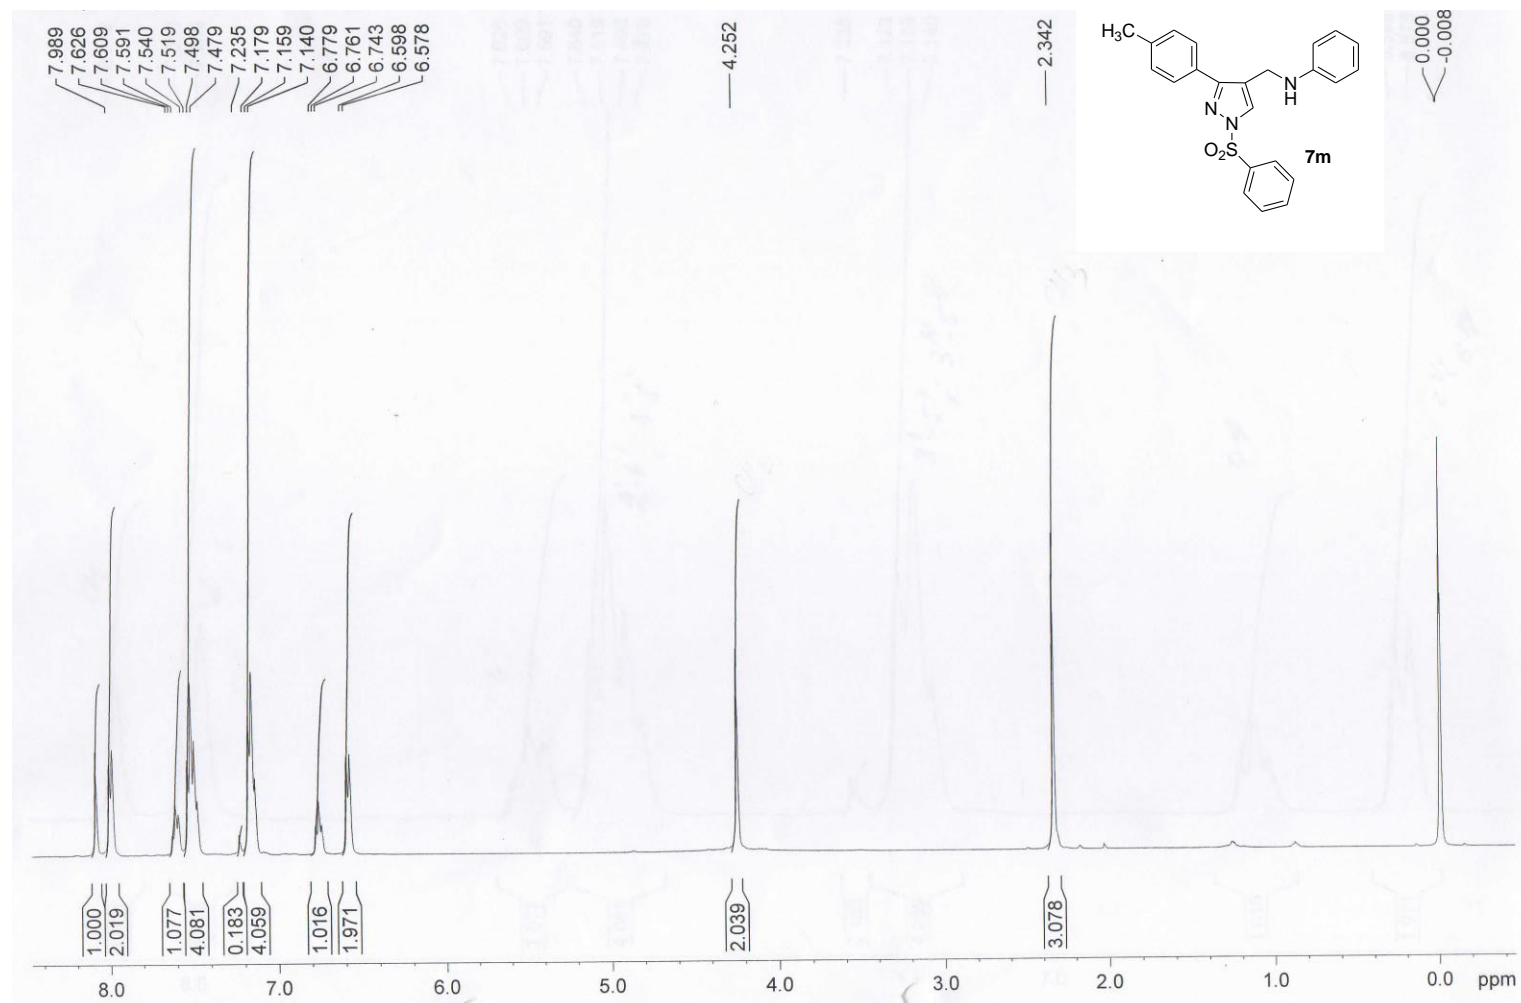

Fig. S 13. <sup>1</sup>H NMR spectrum of compound **7m**



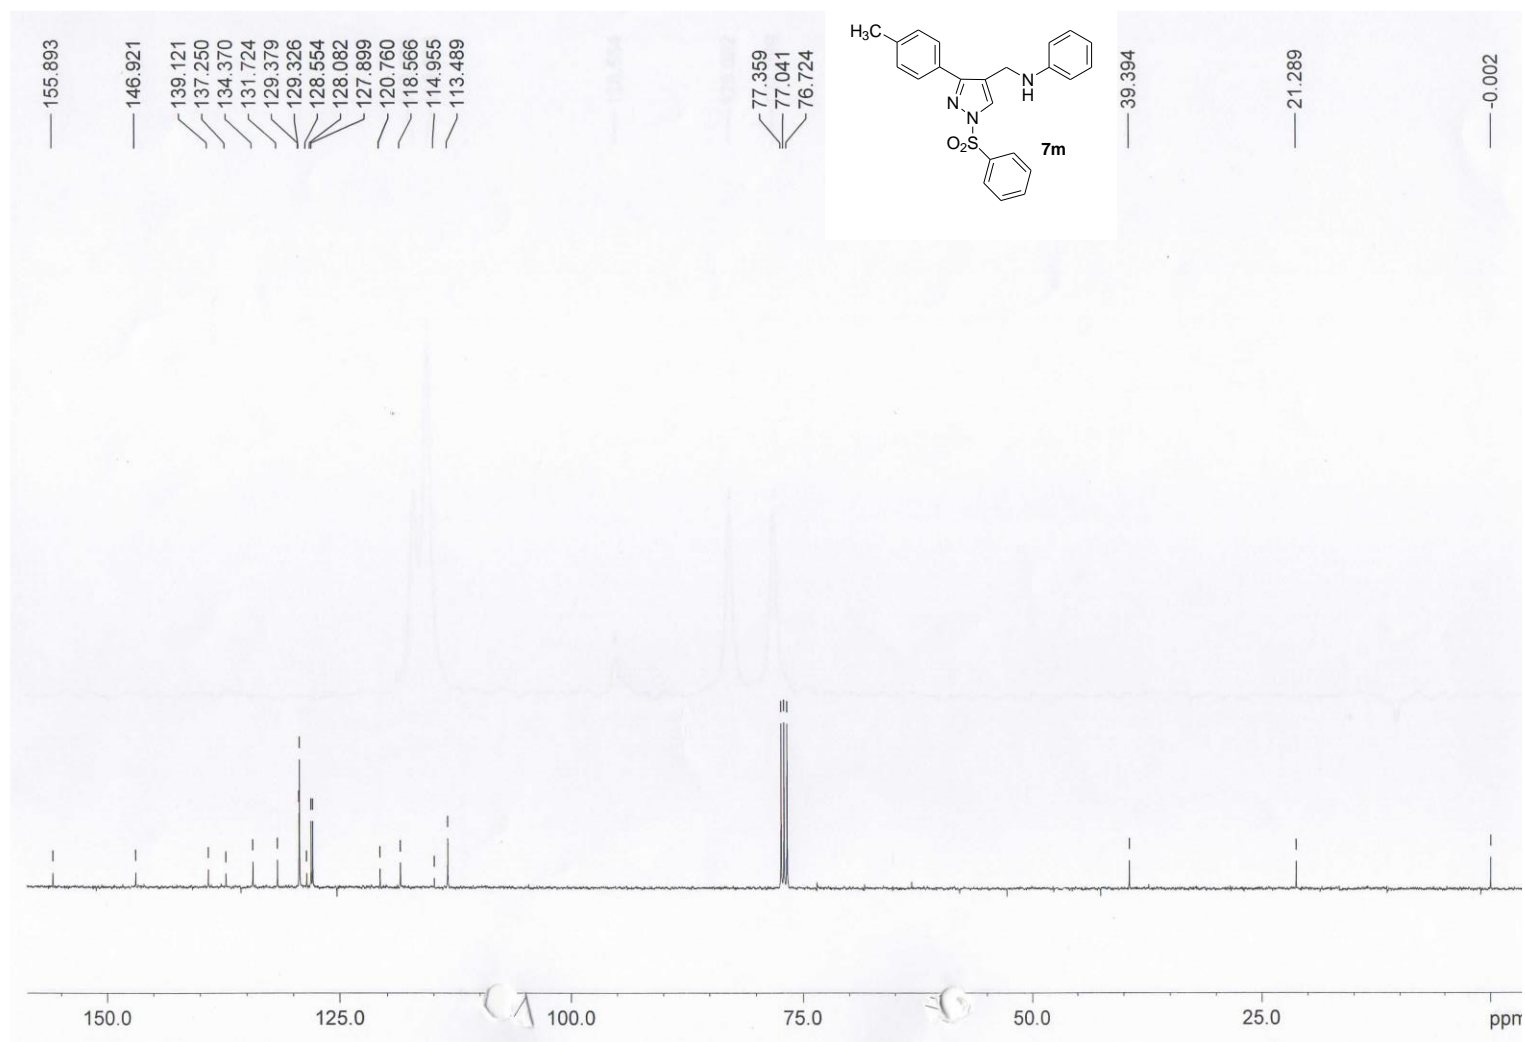

Fig. S 13.  $^{13}\text{C}$  NMR spectrum of compound **7m**

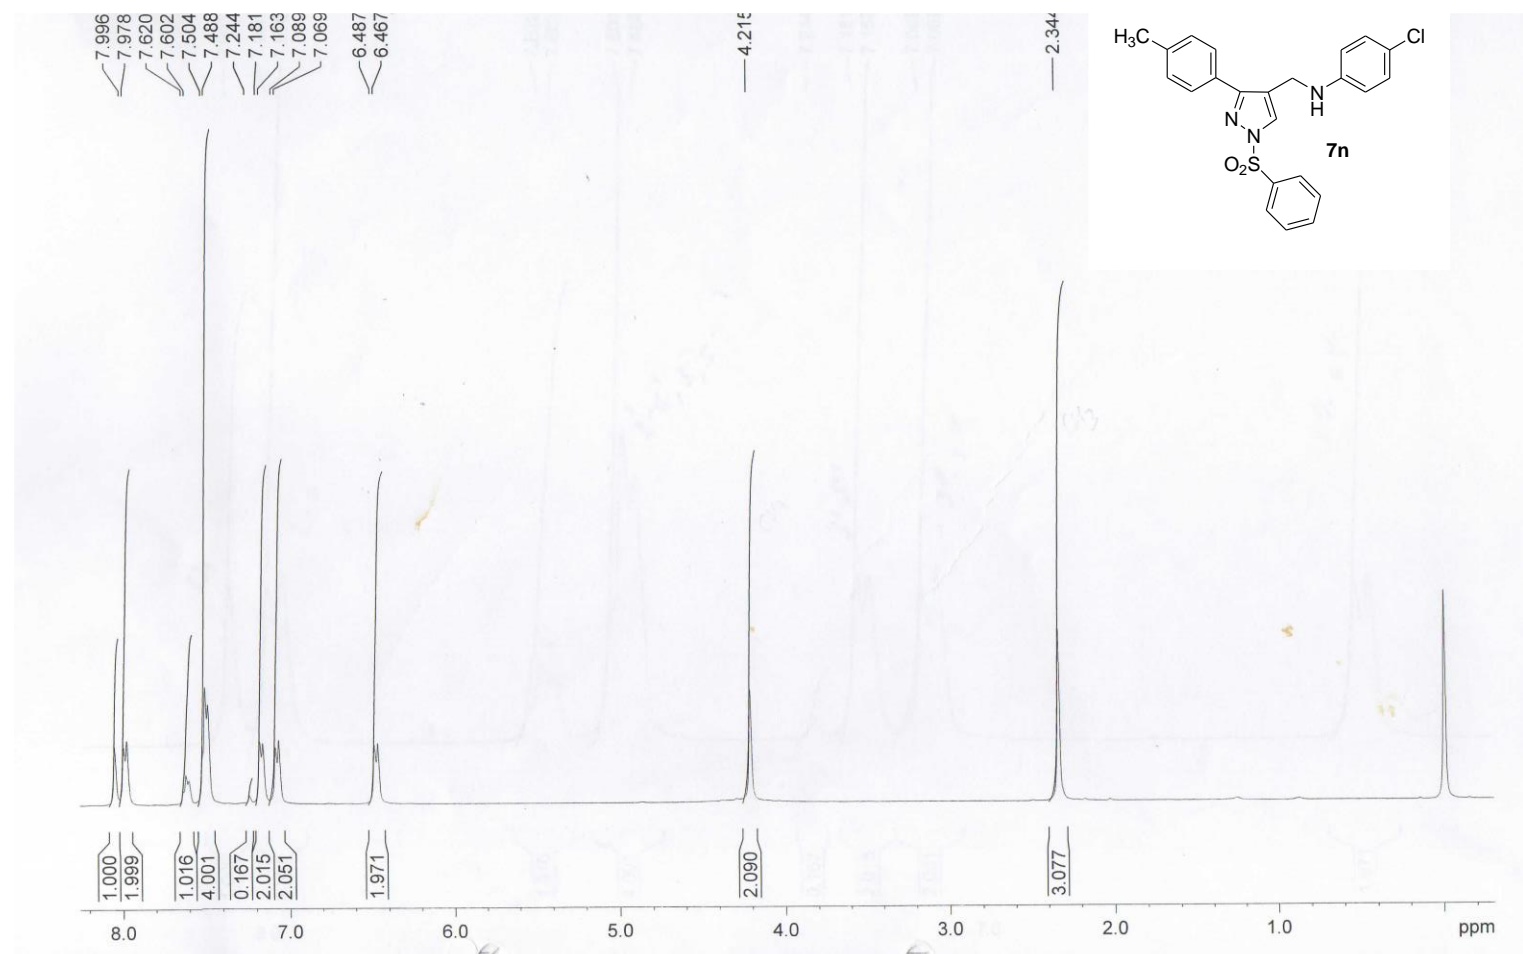

Fig. S 14. <sup>1</sup>H NMR spectrum of compound **7n**

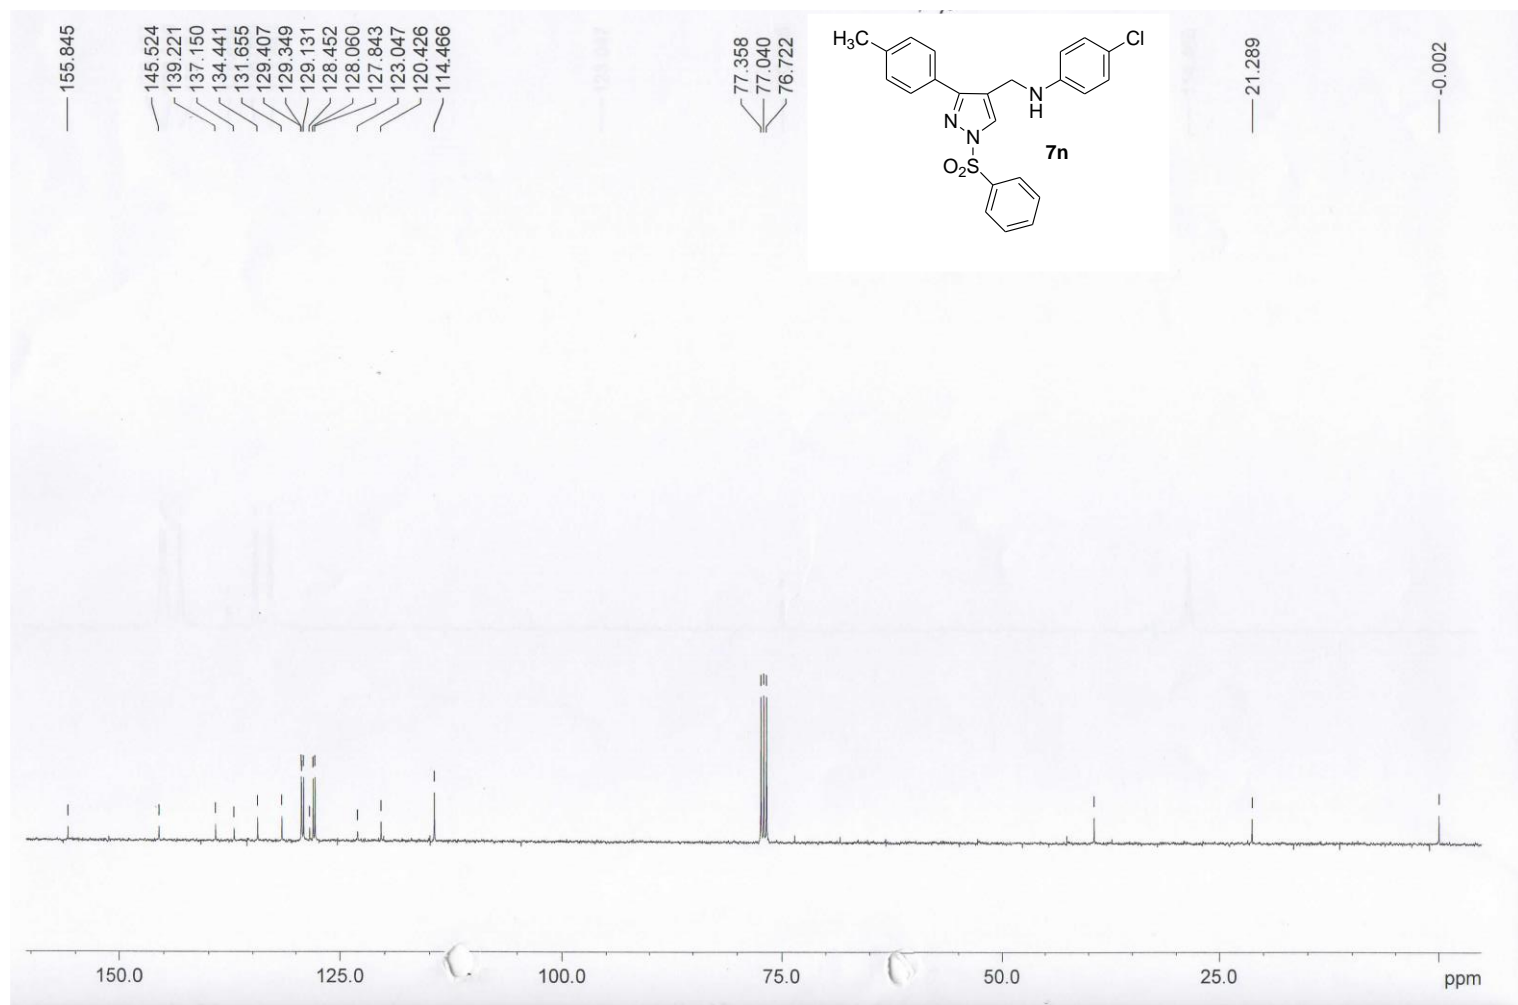

Fig. S 14.  $^{13}\text{C}$  NMR spectrum of compound **7n**

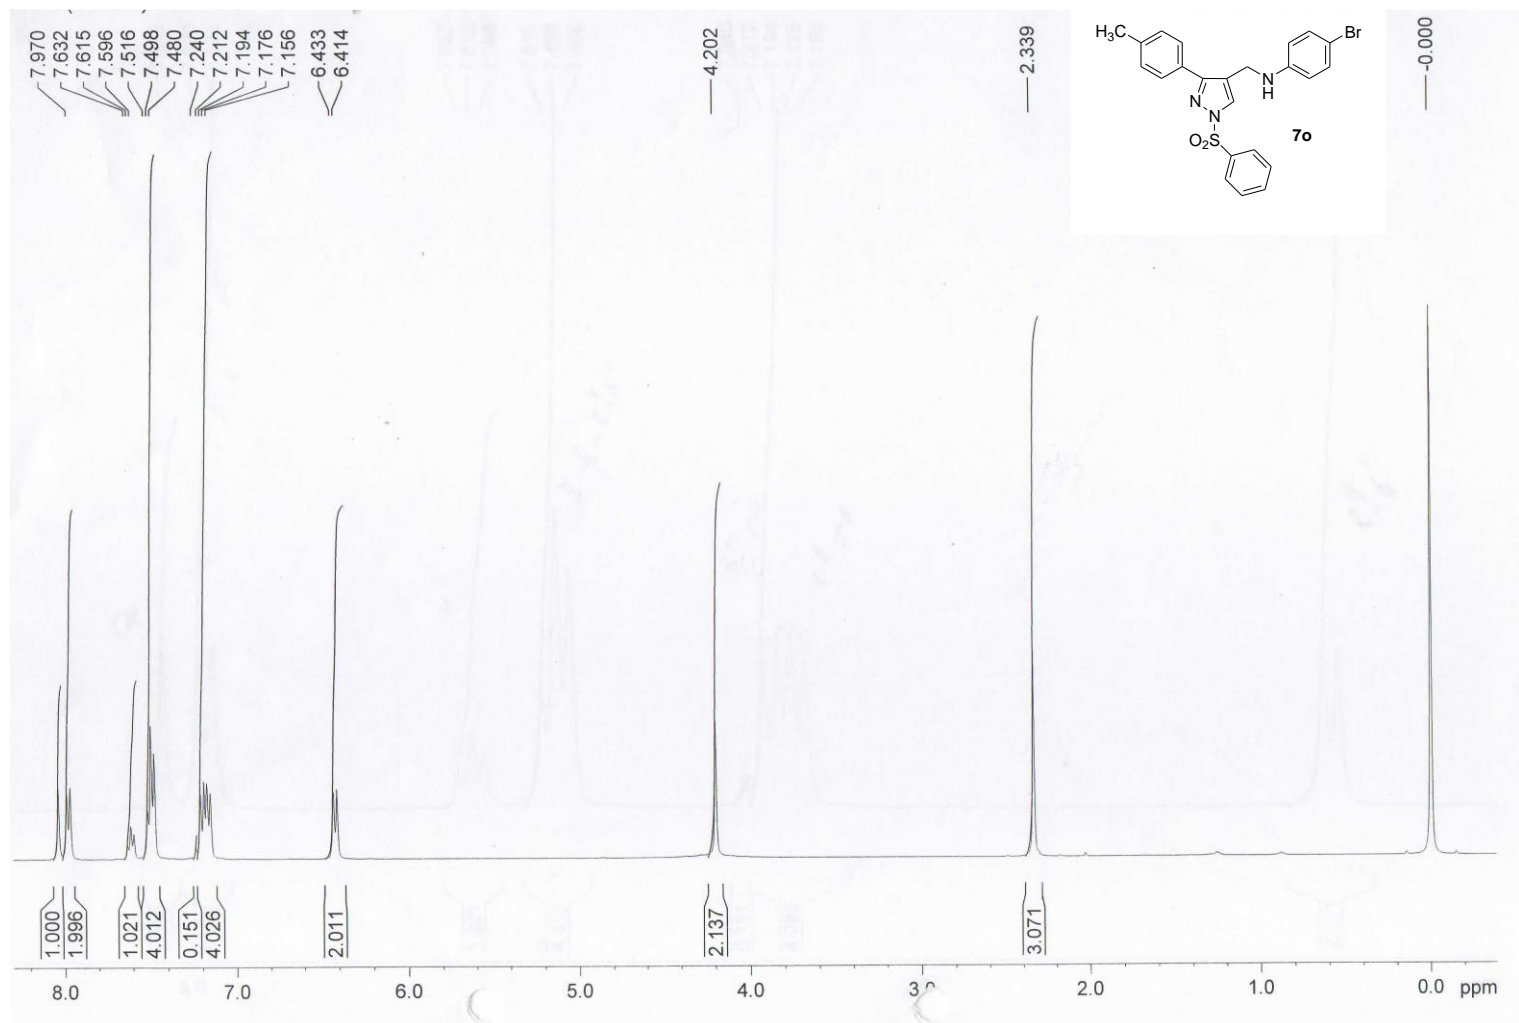

Fig. S 15. <sup>1</sup>H NMR spectrum of compound **7o**

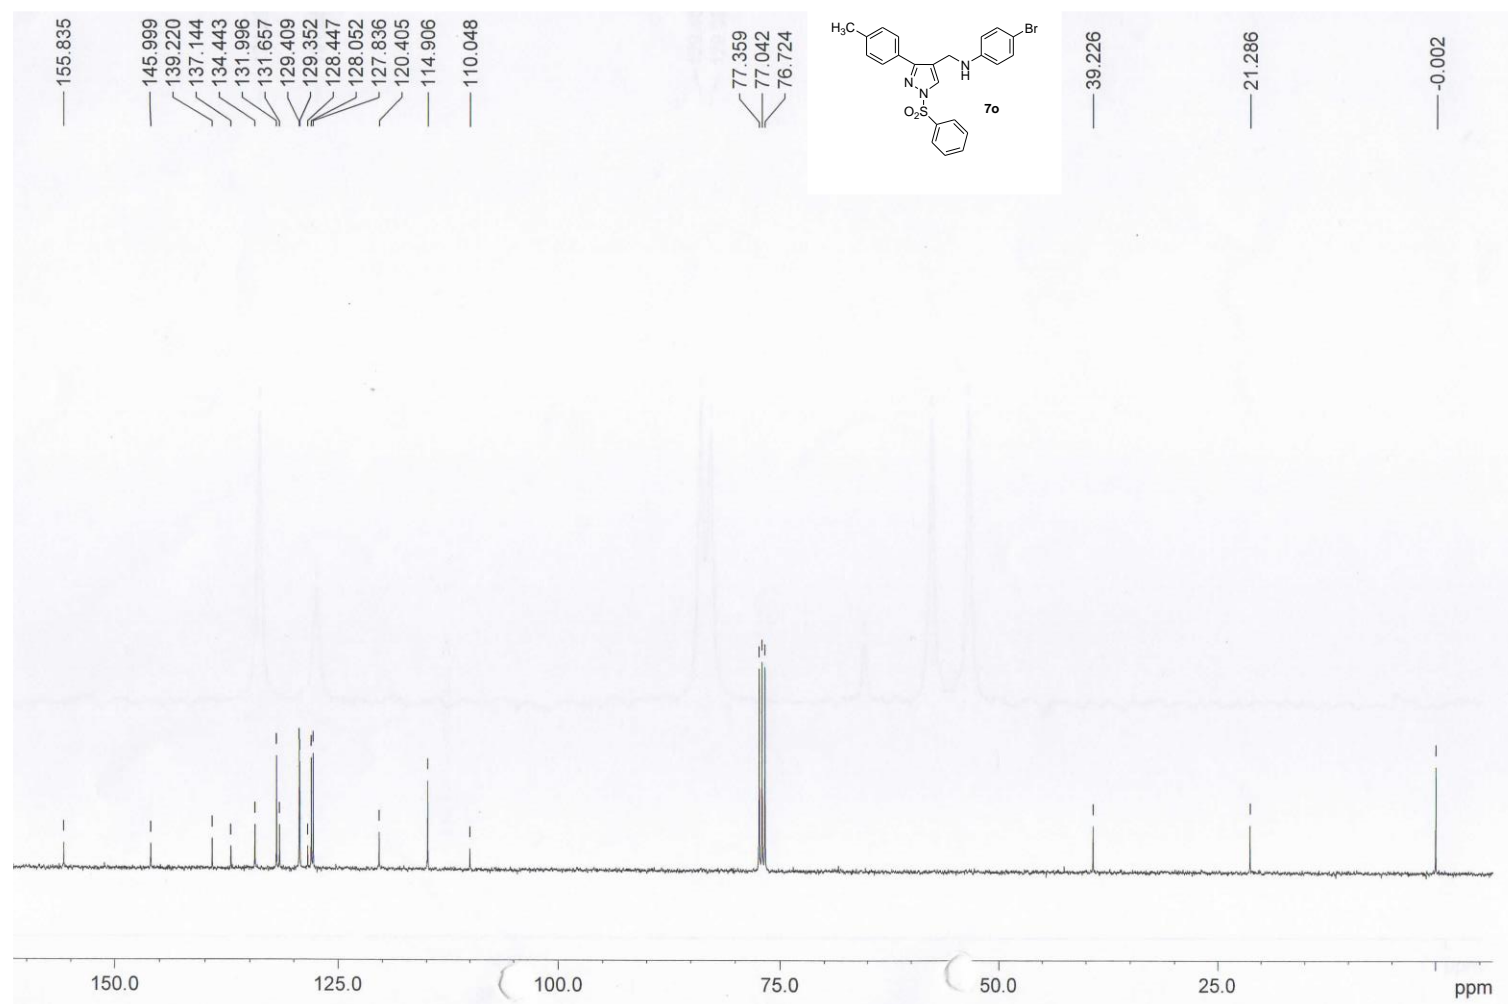

Fig. S 15. <sup>13</sup>C NMR spectrum of compound **7o**

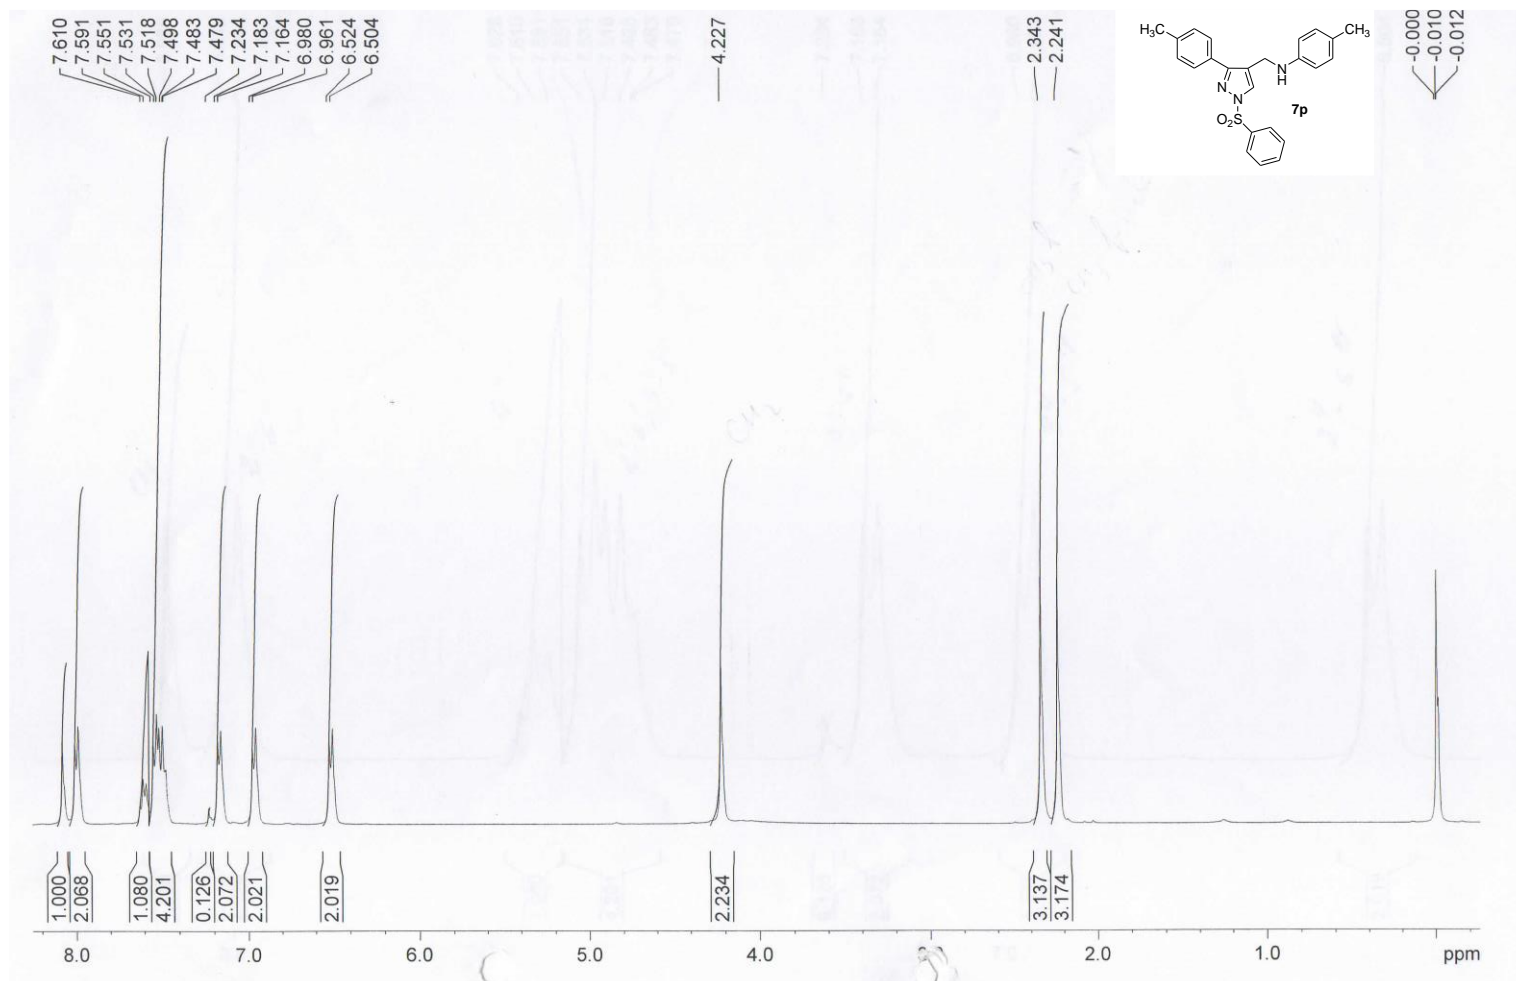

Fig. S 16. <sup>1</sup>H NMR spectrum of compound **7p**

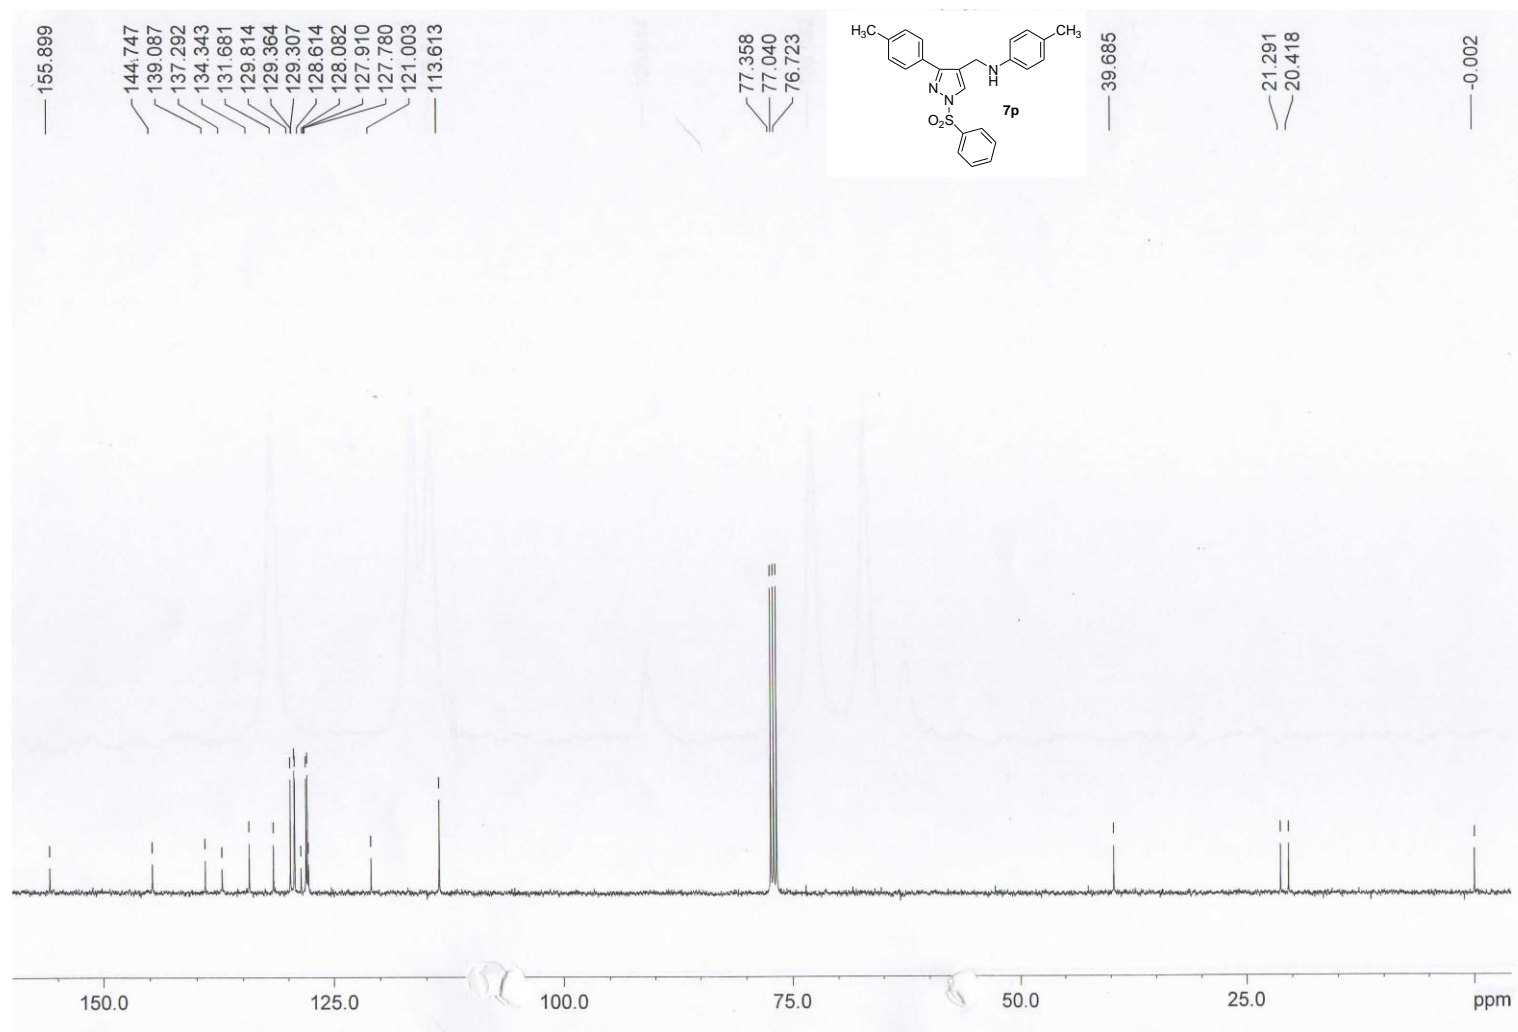

Fig. S 16.  $^{13}\text{C}$  NMR spectrum of compound **7p**
